# Supplementary material
Source: PubMed Central journal article supplement (PMC7418862)
Supplement: NIHMS1038308-supplement-Appendix_pdf.pdf [file NIHMS1038308-supplement-Appendix_pdf.pdf]

# Appendix for “On high-dimensional constrained maximum likelihood inference”

## A Technical details of the counter example

**Lemma 1** (A counter example) *In (5) in the main text, we write  $y = \beta_0 + \boldsymbol{\beta}^\top \mathbf{x}$ , where  $\mathbf{x} = (x_1, \dots, x_p)$  are independently distributed from  $N(\mu_i, 1)$  with  $\mu_1 = 0$  and  $\mu_j = 1; 2 \leq j \leq p$ , and  $\epsilon$  is  $N(0, 1 - n^{-1})$ , independent of  $\mathbf{x}$ . Assume that  $\beta_0 = 0$  and  $\boldsymbol{\beta} = n^{-1/2}, 0, \dots, 0$ , or,  $y = n^{-1/2}x_1 + \epsilon$ . Then Assumption 3 is violated. Now consider a hypothesis test of  $H_0 : \beta_0 = 0$  versus  $H_1 : \beta_0 \neq 0$ . If  $\frac{\log p}{n} \rightarrow 0$  as  $n, p \rightarrow \infty$ , then  $\Lambda_n(B) \xrightarrow{p} \infty$  as  $n, p \rightarrow \infty$ , with  $B = \{0\}$ .*

**Proof of Lemma 1.** Under the linear model, we have that

$$y_i = \beta_0 + \boldsymbol{\beta}^\top \mathbf{x}_i + \epsilon_i; i = 1, \dots, n, \quad (\text{A.1})$$

where  $\boldsymbol{\beta} = (\beta_1, 0, \dots, 0)$  and  $\beta_0 = 0$ ,  $\mathbf{x}_i = (x_{i1}, \dots, x_{ip}) \sim N(\boldsymbol{\mu}, \mathbf{I}_{p \times p})$ , and  $\epsilon_i \sim N(0, 1 - \beta_1^2)$  and is independent of  $\mathbf{x}_i$ . Then, the constrained MLE for  $\beta_0$  is

$$\hat{\beta}_0^{(1)} = \underset{\sum_{i=1}^p \mathbb{I}(\beta_i \neq 0) \leq 1}{\operatorname{argmin}} \sum_{i=1}^n (y_i - \beta_0 - \boldsymbol{\beta}^\top \mathbf{x}_i)^2 = \bar{y} - \widehat{\operatorname{cor}}(x_{\cdot j^*}, y) \frac{s_y}{s_{x_{\cdot j^*}}} \bar{x}_{\cdot j^*}, \quad (\text{A.2})$$

where  $x_{\cdot j}$  denotes a  $n$ -dimensional vector  $(x_{1j}, \dots, x_{nj})$ ,  $\widehat{\operatorname{cor}}$  denotes the sample correlation between two vectors,  $\bar{x}$  and  $s_x$  denote the sample mean and sample covariance of a vector  $x$ ,

respectively, and

$$j^* = \operatorname{argmax}_{1 \leq j \leq p} \widehat{\operatorname{cor}}(x_{.j}, y) \quad (\text{A.3})$$

denotes the index of which feature has the largest sample correlation between  $y$ . For each observation  $(y_i, \mathbf{x}_i)$ , it is easy to write out its joint distribution

$$(y_i, x_{i1}, \dots, x_{ip}) \sim N \left( (\beta_1 \mu_1, \mu_1, \dots, \mu_p)^\top, \begin{pmatrix} 1 & \beta_1 & 0 & \cdots & 0 \\ \beta_1 & 1 & 0 & \cdots & 0 \\ 0 & 0 & 1 & \cdots & 0 \\ \vdots & \vdots & & \ddots & \\ 0 & 0 & 0 & \cdots & 1 \end{pmatrix} \right). \quad (\text{A.4})$$

Hence, the conditional distribution of  $\mathbf{x}_i$  given  $y_i$  is

$$\mathbf{x}_i | y_i \sim N \left( (\beta_1(y_i - \beta_1 \mu_1) + \mu_1, \mu_2, \dots, \mu_p)^\top, \begin{pmatrix} 1 - \beta_1^2 & 0 & \cdots & 0 \\ 0 & 1 & \cdots & 0 \\ \vdots & \vdots & \ddots & \vdots \\ 0 & 0 & \cdots & 1 \end{pmatrix} \right) \quad (\text{A.5})$$

from which we can easily see that components of  $\mathbf{x}_i$  are conditionally independent given  $y_i$ .

Note that

$$\widehat{\operatorname{cor}}(x_{.j}, y) = \frac{(n-1)^{-1} \sum_{i=1}^n x_{ij}(y_i - \bar{y})}{s_{.j} s_y}, j = 1, \dots, p \quad (\text{A.6})$$

and  $\operatorname{Var}(y) = \operatorname{Var}(x_{ij}) = 1$ . Hence,

$$\sqrt{n} \widehat{\operatorname{cor}}(x_{.j}, y) | y \stackrel{d}{=} Z_j + o_p(1), \quad (\text{A.7})$$

where  $Z_j = \frac{\sum_{i=1}^n x_{ij}(y_i - \bar{y})}{(n-1)s_y}, j = 1, \dots, p$ , and  $Z_j$ 's are independent and normally distributed

conditioned on  $\mathbf{y}$ . By (A.5), we have that

$$Z_1 \sim N(\beta_1 s_y, 1 - \beta_1^2) \text{ and } Z_j \sim N(0, 1) \text{ for } j = 2, \dots, p. \quad (\text{A.8})$$

Consequently, conditioned on  $\mathbf{y}$ ,

$$\hat{\beta}_0^{(1)} = \bar{y} - \widehat{\text{cor}}(x_{\cdot j^*}, y) \frac{s_y}{s_{x_{\cdot j^*}}} \bar{x}_{\cdot j^*} = \bar{y} - \beta_1 \mu_1 + \beta_1 \mu_1 - \widehat{\text{cor}}(x_{\cdot j^*}, y) s_y \frac{\bar{x}_{\cdot j^*} - \mu_{j^*}}{s_{x_{\cdot j^*}}} - \widehat{\text{cor}}(x_{\cdot j^*}, y) s_y \frac{\mu_{j^*}}{s_{x_{\cdot j^*}}}$$

Now, we let  $\mu_1 = 0$  and  $\mu_2 = \dots = \mu_p = 1$ . Moreover, note that

$$\bar{y} - \beta_1 \mu_1 = O_p\left(\frac{1}{\sqrt{n}}\right) \text{ and } \left| \frac{\bar{x}_{j^*} - \mu_{j^*}}{s_{x_{j^*}}} \right| \leq \max_{1 \leq j \leq p} \left| \frac{\bar{x}_j - \mu_j}{s_{x_j}} \right| \leq O\left(\sqrt{\frac{\log p}{n}}\right). \quad (\text{A.9})$$

Hence, if  $\sqrt{\frac{\log p}{n}} \leq O(1)$ , then

$$\hat{\beta}_0^{(1)} = -\widehat{\text{cor}}(x_{\cdot j^*}, y) s_y \frac{\mu_{j^*}}{s_{x_{\cdot j^*}}} + O_p\left(\frac{1}{\sqrt{n}}\right). \quad (\text{A.10})$$

Now we choose  $\beta_1$  to be small number so that with nonzero probability  $\{j^* \neq 1\}$ , that is, we need  $\mathbb{P}(Z_1 \leq \min_{2 \leq j \leq p} Z_j)$  to be nonzero, which is easy to achieve when  $\beta_1$  is chosen to be close to 0. Under the event  $\{j^* \geq 2\}$

$$\begin{aligned} \hat{\beta}_0^{(1)} &= -\widehat{\text{cor}}(x_{\cdot j^*}, y) s_y \frac{\mu_{j^*}}{s_{x_{\cdot j^*}}} + O_p\left(\frac{1}{\sqrt{n}}\right) = -\max_{2 \leq j \leq p} \widehat{\text{cor}}(x_{\cdot j}, y) \frac{s_y}{s_{x_{\cdot j^*}}} + O_p\left(\frac{1}{\sqrt{n}}\right) \\ &= O_p\left(\sqrt{\frac{\log p}{n}}\right) + O_p\left(\frac{1}{\sqrt{n}}\right), \end{aligned}$$

because  $\max_{2 \leq j \leq p} \widehat{\text{cor}}(x_{\cdot j}, y) = O_p\left(\sqrt{\frac{\log p}{n}}\right)$  and  $s_y \rightarrow 1$  in probability and  $s_{x_{\cdot j^*}} \rightarrow 1$  in probability. Hence,  $n \left(\hat{\beta}_0^{(1)}\right)^2 \rightarrow \infty$  if  $p \rightarrow \infty$  as  $n \rightarrow \infty$ . Next, we show that under this model, the log-likelihood ratio test statistic is of the same order as  $n \hat{\beta}_0^2$  under the null model.

Toward this end, denote by  $f(\beta_0) = \sup_{\|\beta\|_0 \leq 1, \sigma > 0} n^{-1} L_n(\beta_0, \beta, \sigma)$ . By definition of  $\hat{\beta}_0^{(1)}$ , it must maximize  $f(\beta_0)$  as a function of  $\beta_0$  and hence must satisfy  $f'(\hat{\beta}_0^{(1)}) = 0$ . Moreover, we note that the log-likelihood ratio can be rewritten in terms of  $f(\cdot)$

$$\Lambda_n(B) = 2n(f(\hat{\beta}_0^{(1)}) - f(0)) \quad (\text{A.11})$$

Applying a Taylor expansion around  $\hat{\beta}_0^{(1)}$ , we obtain

$$\Lambda_n(B) = -n(\hat{\beta}_0^{(1)})^2 f''(\beta^*) \quad (\text{A.12})$$

where  $\beta^*$  is some number between 0 and  $\hat{\beta}_0^{(1)}$ . Under  $\log p/n \rightarrow 0$ , it is easy to show that  $\hat{\beta}_0^{(1)}$  is consistent, hence converges to 0 in probability. Hence,  $\Lambda_n(B) = -n(\hat{\beta}_0^{(1)})^2 (f''(0) + o_p(1)) \xrightarrow{\mathbb{P}} \infty$ , which completes the proof.

## B Proofs of Lemmas 2-9

This section provides detailed proofs of Lemmas 2-9 to be used in “On high-dimensional constrained maximum likelihood inference”.

**Lemma 2** *For any symmetric matrices  $\mathbf{C}_1$  and  $\mathbf{C}_2$ ,  $\text{vec}(\mathbf{C}_1)^\top \text{vec}(\mathbf{C}_2) = \text{tr}(\mathbf{C}_1 \mathbf{C}_2)$ . Moreover, for any positive definite matrix  $\mathbf{C} \succ 0$ ,*

$$\nabla (\log \det \mathbf{C}) = -\text{vec}(\mathbf{C}^{-1}), \quad \nabla^2 (-\log \det \mathbf{C}) = \mathbf{C}^{-1} \otimes_s \mathbf{C}^{-1}, \quad (\text{B.1})$$

$$\mathbf{I} = \frac{1}{2} \Sigma^0 \otimes_s \Sigma^0, \quad (\text{B.2})$$

$$\text{Var}(\text{vec}(\mathbf{X} \mathbf{X}^\top)) = 4\mathbf{I} \text{ with } \mathbf{X} \sim N(0, \Sigma^0), \quad (\text{B.3})$$

$$\text{vec}(\mathbf{C})^\top \mathbf{I} \text{vec}(\mathbf{C}) = \frac{1}{2} \text{tr}(\Sigma^0 \mathbf{C} \Sigma^0 \mathbf{C}). \quad (\text{B.4})$$

**Proof of Lemma 2:** By the definition, (B.1) follows from an identity:

$$\text{vec}(\mathbf{C}_1)^\top \text{vec}(\mathbf{C}_2) = \sum_{i \leq j} (1 + \mathbb{I}(i \neq j)) \mathbf{S}_1(i, j) \mathbf{S}_2(i, j) = \sum_{i, j} \mathbf{S}_1(i, j) \mathbf{S}_2(i, j) = \text{tr}(\mathbf{S}_1 \mathbf{S}_2).$$

Moreover, it follows from Taylor's expansion of the log det function that

$$\begin{aligned} \log \det(\mathbf{C} + \mathbf{\Delta}) - \log \det(\mathbf{C}) &= \text{tr}(\mathbf{C}^{-1} \mathbf{\Delta}) - \frac{1}{2} \text{tr}((\mathbf{C}^{-1} \mathbf{\Delta})^2) + o(\|\mathbf{C}^{-1/2} \mathbf{\Delta} \mathbf{C}^{-1/2}\|_F^2) \\ &= \text{vec}(\mathbf{C}^{-1})^\top \text{vec}(\mathbf{\Delta}) - \frac{1}{2} \text{vec}(\mathbf{\Delta})^\top \text{vec}(\mathbf{C}^{-1} \mathbf{\Delta} \mathbf{C}^{-1}) + o(\|\mathbf{C}^{-1/2} \mathbf{\Delta} \mathbf{C}^{-1/2}\|_F^2) \\ &= \text{vec}(\mathbf{C}^{-1})^\top \text{vec}(\mathbf{\Delta}) - \frac{1}{2} \text{vec}(\mathbf{\Delta})^\top (\mathbf{C}^{-1} \otimes_s \mathbf{C}^{-1}) \text{vec}(\mathbf{\Delta}) + o(\|\mathbf{C}^{-1/2} \mathbf{\Delta} \mathbf{C}^{-1/2}\|_F^2), \end{aligned}$$

where the definition of  $\otimes_s$  and (B.1) have been used. This yields (B.2).

For (B.3), the log-likelihood for  $\mathbf{X} \sim N(0, \mathbf{\Sigma}^0)$  is  $-\frac{1}{2} \text{vec}(\mathbf{\Omega}^0)^\top \text{vec}(\mathbf{X} \mathbf{X}^\top) + \frac{1}{2} \log \det(\mathbf{\Omega}^0)$ . Using properties of the exponential family [2],  $\text{Var}(\frac{1}{2} \text{vec}(\mathbf{X} \mathbf{X}^\top)) = \nabla^2(-\frac{1}{2} \log \det \mathbf{\Omega}^0) = \mathbf{I}$ , implying (B.3). Finally, for any symmetric matrix  $\mathbf{C}$ , note that

$$\begin{aligned} \text{vec}(\mathbf{C})^\top \mathbf{I} \text{vec}(\mathbf{C}) &= \frac{1}{2} \text{vec}(\mathbf{C})^\top (\mathbf{\Sigma}^0 \otimes_s \mathbf{\Sigma}^0) \text{vec}(\mathbf{C}) \\ &= \frac{1}{2} \text{vec}(\mathbf{C})^\top \text{vec}(\mathbf{\Sigma}^0 \mathbf{C} \mathbf{\Sigma}^0) = \frac{1}{2} \text{tr}(\mathbf{C} \mathbf{\Sigma}^0 \mathbf{C} \mathbf{\Sigma}^0), \end{aligned}$$

leading to (B.4). This completes the proof.

**Lemma 3** For any symmetric matrix  $\mathbf{T}$  and  $\nu > 0$

$$\mathbb{P}(|\text{tr}((\mathbf{S} - \mathbf{\Sigma}^0) \mathbf{T})| \geq \nu) \leq 2 \exp\left(-n \frac{\nu^2}{9 \|\mathbf{T}\|^2 + 8\nu \|\mathbf{T}\|}\right), \quad (\text{B.5})$$

where  $\|\mathbf{T}\|^2 = \frac{n}{2} \text{Var}(\text{tr}((\mathbf{S} - \mathbf{\Sigma}^0) \mathbf{T}))$ . Furthermore, for  $\mathbf{T}_1, \dots, \mathbf{T}_K$  such that  $\|\mathbf{T}_k\| \leq c_0$ ;  $k =$

$1, \dots, K$  with  $c_0 > 0$  and any  $\nu > 0$ , we have that

$$\mathbb{P} \left( \max_{1 \leq k \leq K} |\text{tr}((\mathbf{S} - \boldsymbol{\Sigma}^0)\mathbf{T}_k)| \geq \nu \right) \leq 2 \exp \left( -n \frac{\nu^2}{9c_0^2 + 8c_0\nu} + \log K \right), \quad (\text{B.6})$$

which implies that  $\max_{1 \leq k \leq K} |\text{tr}((\mathbf{S} - \boldsymbol{\Sigma}^0)\mathbf{T}_k)| = O_p \left( c_0 \sqrt{\frac{\log K}{n}} \right)$ . Particularly, for any  $\nu > 0$  and any index set  $B$ ,

$$\mathbb{P} \left( \|\text{vec}_B(\mathbf{S} - \boldsymbol{\Sigma}^0)\|_\infty \geq \nu \right) \leq 2 \exp \left( -n \frac{\nu^2}{9\lambda_{\max}^2(\boldsymbol{\Sigma}^0) + 8\nu\lambda_{\max}(\boldsymbol{\Sigma}^0)} + \log |B| \right), \quad (\text{B.7})$$

implying that  $\|\text{vec}_B(\mathbf{S} - \boldsymbol{\Sigma}^0)\|_\infty = O_p \left( \lambda_{\max}(\boldsymbol{\Sigma}^0) \sqrt{\frac{\log |B|}{n}} \right)$ .

**Proof of Lemma 3:** By Markov's inequality, for any  $\nu > 0$ ,

$$\begin{aligned} P \left( \text{tr}((\mathbf{S} - \boldsymbol{\Sigma}^0)\mathbf{T}) \geq \nu \right) &\leq \exp \left( -\frac{\gamma\sqrt{n}\nu}{2} \right) \mathbb{E} \exp \left( \frac{\gamma\sqrt{n}}{2} \text{tr}((\mathbf{S} - \boldsymbol{\Sigma}^0)\mathbf{T}) \right) \\ &\leq \exp \left( \underbrace{\log \mathbb{E} \exp \left( \frac{\gamma\sqrt{n}}{2} \text{tr}((\mathbf{S} - \boldsymbol{\Sigma}^0)\mathbf{T}) \right)}_{I_1} - \frac{\gamma\sqrt{n}\nu}{2} \right), \end{aligned}$$

where  $\gamma$  is chosen such that  $\gamma \in \left[ 0, \frac{M_0\sqrt{n}}{\|\sqrt{\boldsymbol{\Sigma}^0}\mathbf{T}\sqrt{\boldsymbol{\Sigma}^0}\|_F} \right]$  for some constant  $0 < M_0 < 1$ , which is to be determined later. Moreover, after some calculations, we have that

$$\begin{aligned} \mathbb{E} \exp \left( \frac{\gamma\sqrt{n}}{2} \text{tr}((\mathbf{S} - \boldsymbol{\Sigma}^0)\mathbf{T}) \right) &= \left( \mathbb{E} \exp \left( \frac{\gamma\sqrt{n}}{2} \text{tr}((\mathbf{X}\mathbf{X}^T - \boldsymbol{\Sigma}^0)\mathbf{T}) \right) \right)^n \\ &= \exp \left( -\frac{\gamma\sqrt{n}}{2} \text{tr}(\boldsymbol{\Sigma}^0\mathbf{T}) \right) \det \left( \mathbf{I} - \frac{\gamma}{\sqrt{n}} \boldsymbol{\Sigma}^0\mathbf{T} \right)^{-n/2} \quad (\text{B.8}) \end{aligned}$$

where  $\mathbf{X} \sim N(\mathbf{0}, \boldsymbol{\Sigma}^0)$  and the last equality requires that  $\sqrt{n}\boldsymbol{\Omega}^0 \succeq \gamma\mathbf{T}$ , which is ensured by the fact that  $\gamma \leq \frac{M_0\sqrt{n}}{\|\sqrt{\boldsymbol{\Sigma}^0}\mathbf{T}\sqrt{\boldsymbol{\Sigma}^0}\|_F} < \frac{\sqrt{n}}{\|\sqrt{\boldsymbol{\Sigma}^0}\mathbf{T}\sqrt{\boldsymbol{\Sigma}^0}\|_F}$ . Consequently,

$$\log \mathbb{E} \exp \left( \frac{\gamma\sqrt{n}}{2} \text{tr}((\mathbf{S} - \boldsymbol{\Sigma}^0)\mathbf{T}) \right) = \log \det \left( \mathbf{I} - \frac{\gamma}{\sqrt{n}} \boldsymbol{\Sigma}^0\mathbf{T} \right)^{-n/2} - \frac{\gamma\sqrt{n}}{2} \text{tr}(\boldsymbol{\Sigma}^0\mathbf{T}). \quad (\text{B.9})$$

An expansion of the log det function gives

$$\begin{aligned} & \log \det(\mathbf{I} - \frac{\gamma}{\sqrt{n}} \boldsymbol{\Sigma}^0 \mathbf{T})^{-n/2} \\ &= \frac{\gamma \sqrt{n}}{2} \text{tr}(\boldsymbol{\Sigma}^0 \mathbf{T}) + \frac{\gamma^2}{4} \text{tr}((\boldsymbol{\Sigma}^0 \mathbf{T})^2) + \underbrace{\frac{n}{2} \sum_{l=3}^{\infty} l^{-1} \text{tr} \left( \left( \frac{\gamma \boldsymbol{\Sigma}^0 \mathbf{T}}{\sqrt{n}} \right)^l \right)}_{I_2}. \end{aligned} \quad (\text{B.10})$$

For  $I_2$ , note that  $I_2 \leq \frac{n}{2} \sum_{l=3}^{\infty} l^{-1} \left( \frac{\gamma \|\mathbf{T}\|}{\sqrt{n}} \right)^l \leq \gamma^2 \|\mathbf{T}\|^2 \frac{3-M_0}{12(1-M_0)}$ . Similarly,  $I_1 \leq \frac{M_1+1}{4} \gamma^2 \|\mathbf{T}\|^2 - \frac{\gamma \sqrt{n} \nu}{2}$ , where  $M_1 = \frac{3-M_0}{3(1-M_0)}$ . Minimizing this upper bound of  $I_1$  as a function of  $\gamma$  over the interval  $\left[0, \frac{M_0 \sqrt{n}}{\|\mathbf{T}\|}\right]$ , we obtain that

$$\begin{aligned} I_1 &\leq -\frac{n\nu^2}{4(1+M_1)\|\mathbf{T}\|^2} && \text{if } \nu \leq M_0(1+M_1)\|\mathbf{T}\| \\ I_1 &\leq -\frac{nM_0}{2\|\mathbf{T}\|} \left( \nu - \frac{M_0(1+M_1)}{2}\|\mathbf{T}\| \right) && \text{otherwise.} \end{aligned}$$

A combination of these two cases yields that  $I_1 \leq -\frac{nM_0\nu^2}{4M_0(M_1+1)\|\mathbf{T}\|^2+2\nu\|\mathbf{T}\|}$ . Set  $M_0 = 4^{-1}$ , and then  $M_1 = 11/9$ , we obtain the desired results

$$P\left(\text{tr}((\mathbf{S} - \boldsymbol{\Sigma}^0)\mathbf{T}) \geq \nu\right) \leq \exp\left(-n \frac{\nu^2}{9\|\mathbf{T}\|^2 + 8\nu\|\mathbf{T}\|}\right),$$

for any  $\nu > 0$ . The other direction follows exactly the same argument, and thus is omitted.

Finally, (B.7) follows by letting  $\{\mathbf{T}_1, \dots, \mathbf{T}_k\} = \{(\mathbf{e}_i^\top \mathbf{e}_j + \mathbf{e}_j^\top \mathbf{e}_i)/2\}_{(i,j) \in B}$  then applying an inequality  $\|\sqrt{\boldsymbol{\Sigma}^0}(\mathbf{e}_i^\top \mathbf{e}_j + \mathbf{e}_j^\top \mathbf{e}_i)\sqrt{\boldsymbol{\Sigma}^0}/2\|_F^2 \leq \lambda_{\max}(\boldsymbol{\Sigma}^0)$  and a union bound. This completes the proof.

**Lemma 4** (*The Kullback-Leibler divergence and Fisher-norm*) For a positive definite matrix

$\Omega$  the following connection holds:

$$K(\Omega^0, \Omega) \geq \min \left( \frac{1}{16\sqrt{2}}, \frac{\sqrt{K(\Omega^0, \Omega)}}{2\sqrt{6}} \right) \|\Omega - \Omega^0\|, \quad (\text{B.11})$$

$$K(\Omega^0, \Omega) \geq \min \left( \frac{1}{16\sqrt{2}}, \frac{\|\Omega - \Omega^0\|}{24} \right) \|\Omega - \Omega^0\|. \quad (\text{B.12})$$

**Proof of Lemma 4:** Let  $\Delta = \Omega - \Omega^0$  and  $\lambda_1, \dots, \lambda_p$  be the eigenvalues of  $\sqrt{\Sigma^0} \Delta \sqrt{\Sigma^0}$ . Then  $\lambda_j > -1$ ;  $j = 1, \dots, p$ , because  $\mathbf{I}_{p \times p} + \sqrt{\Sigma^0} \Delta \sqrt{\Sigma^0} = \sqrt{\Sigma^0} \Omega \sqrt{\Sigma^0}$  is positive definite. Moreover, let  $B_1 = \sum_{i=1}^p \lambda_i^2 \mathbb{I}(\lambda_i \leq 1/3)$ ,  $B_2 = \sum_{i=1}^p \lambda_i^2 \mathbb{I}(\lambda_i > 1/3)$ , and  $B_3 = \sum_{i=1}^p \lambda_i \mathbb{I}(\lambda_i > 1/3)$ . Easily,  $\|\Omega - \Omega^0\| = \sqrt{B_1 + B_2}$ . Using the inequality  $x - \log(1+x) \geq 6^{-1}x^2 \mathbb{I}(x \leq 1/3) + 8^{-1}x \mathbb{I}(x > 1/3)$  for  $x > -1$ , we have that

$$\begin{aligned} K(\Omega^0, \Omega) &= \frac{1}{2} \left( \text{tr}(\sqrt{\Sigma^0} \Delta \sqrt{\Sigma^0}) - \log \det(\mathbf{I}_{p \times p} + \sqrt{\Sigma^0} \Delta \sqrt{\Sigma^0}) \right) \\ &= \frac{1}{2} \sum_{i=1}^p \lambda_i - \frac{1}{2} \sum_{i=1}^p \log(1 + \lambda_i) \\ &\geq 12^{-1} \sum_{i=1}^p \lambda_i^2 \mathbb{I}(\lambda_i \leq 1/3) + 16^{-1} \sum_{i=1}^p \lambda_i \mathbb{I}(\lambda_i > 1/3) = 12^{-1} B_1 + 16^{-1} B_3. \end{aligned}$$

Next we examine two cases. First, if  $B_1 < B_2$ , then  $\frac{K(\Omega^0, \Omega)}{\|\Omega - \Omega^0\|} \geq \frac{12^{-1}B_1 + 16^{-1}B_3}{\sqrt{B_1 + B_2}} \geq \frac{B_3}{16\sqrt{2}B_2} \geq \frac{1}{16\sqrt{2}}$  because  $B_3^2 \geq B_2$ . If  $B_1 \geq B_2$ , then

$$\frac{K(\Omega^0, \Omega)}{\|\Omega - \Omega^0\|} \geq \frac{12^{-1}B_1 + 16^{-1}B_3}{\sqrt{B_1 + B_2}} \geq \frac{B_1}{12\sqrt{B_1 + B_2}} \geq \frac{B_1 + B_2}{24\sqrt{B_1 + B_2}} \geq \frac{\sqrt{B_1 + B_2}}{24} = \frac{\|\Omega - \Omega^0\|}{24}.$$

Similarly,

$$\frac{K(\Omega^0, \Omega)}{\|\Omega - \Omega^0\|} \geq \sqrt{K(\Omega^0, \Omega)} \frac{\sqrt{12^{-1}B_1 + 16^{-1}B_3}}{\sqrt{B_1 + B_2}} \geq \sqrt{K(\Omega^0, \Omega)} \frac{\sqrt{24^{-1}(B_1 + B_2)}}{\sqrt{B_1 + B_2}} = \frac{\sqrt{K(\Omega^0, \Omega)}}{2\sqrt{6}}.$$

This leads to (B.12) and (B.11).



**Lemma 5** (Rate of convergence of constrained MLE) Let  $\tilde{A} \supseteq A^0$  be an index set. For  $\widehat{\boldsymbol{\Omega}}_{\tilde{A}}$ , we have that

$$\|\widehat{\boldsymbol{\Omega}}_{\tilde{A}} - \boldsymbol{\Omega}^0\| \leq 12 \|\mathbf{I}_{\tilde{A}, \tilde{A}}^{-1/2} \text{vec}(\boldsymbol{\Sigma}^0 - \mathbf{S})\|_2. \quad (\text{B.13})$$

on the event that  $\{\|\mathbf{I}_{\tilde{A}, \tilde{A}}^{-1/2} \text{vec}_{\tilde{A}}(\boldsymbol{\Sigma}^0 - \mathbf{S})\|_2 < \frac{1}{8\sqrt{2}}\}$ . Moreover, if  $\frac{|\tilde{A}| \log p}{n} \rightarrow 0$ , then

$$\|\widehat{\boldsymbol{\Omega}}_{\tilde{A}} - \boldsymbol{\Omega}^0\| = O_p \left( \sqrt{\frac{|\tilde{A}| \log p}{n}} \right). \quad (\text{B.14})$$

**Proof of Lemma 5:** By definition of the CMLE,  $L_n(\widehat{\boldsymbol{\Omega}}_{\tilde{A}}) - L_n(\boldsymbol{\Omega}^0) \geq 0$ , or  $-\log \det \widehat{\boldsymbol{\Omega}}_{\tilde{A}} + \log \det \boldsymbol{\Omega}^0 \leq -\text{tr}((\widehat{\boldsymbol{\Omega}}_{\tilde{A}} - \boldsymbol{\Omega}^0)\mathbf{S})$ . By the Cauchy-Schwarz inequality, this inequality becomes

$$\begin{aligned} 2K(\boldsymbol{\Omega}^0, \widehat{\boldsymbol{\Omega}}_{\tilde{A}}) &\leq \text{tr}((\widehat{\boldsymbol{\Omega}}_{\tilde{A}} - \boldsymbol{\Omega}^0)(\boldsymbol{\Sigma}^0 - \mathbf{S})) \leq \|\sqrt{\boldsymbol{\Sigma}^0}(\widehat{\boldsymbol{\Omega}}_{\tilde{A}} - \boldsymbol{\Omega}^0)\sqrt{\boldsymbol{\Sigma}^0}\|_F \|\mathbf{I}_{\tilde{A}, \tilde{A}}^{-1/2} \text{vec}_{\tilde{A}}(\boldsymbol{\Sigma}^0 - \mathbf{S})\|_2 \\ &= \|\widehat{\boldsymbol{\Omega}}_{\tilde{A}} - \boldsymbol{\Omega}^0\| \|\mathbf{I}_{\tilde{A}, \tilde{A}}^{-1/2} \text{vec}_{\tilde{A}}(\boldsymbol{\Sigma}^0 - \mathbf{S})\|_2 \end{aligned} \quad (\text{B.15})$$

On the other hand, by (B.12)  $\frac{K(\boldsymbol{\Omega}^0, \widehat{\boldsymbol{\Omega}}_{\tilde{A}})}{\|\widehat{\boldsymbol{\Omega}}_{\tilde{A}} - \boldsymbol{\Omega}^0\|} \geq \min \left( \frac{1}{16\sqrt{2}}, \frac{\|\widehat{\boldsymbol{\Omega}}_{\tilde{A}} - \boldsymbol{\Omega}^0\|}{24} \right)$ , which, together with (B.15), implies that  $\min \left( \frac{1}{8\sqrt{2}}, \frac{\|\widehat{\boldsymbol{\Omega}}_{\tilde{A}} - \boldsymbol{\Omega}^0\|}{12} \right) \leq \|\mathbf{I}_{\tilde{A}, \tilde{A}}^{-1/2} \text{vec}_{\tilde{A}}(\boldsymbol{\Sigma}^0 - \mathbf{S})\|_2$ . If  $\frac{\|\widehat{\boldsymbol{\Omega}}_{\tilde{A}} - \boldsymbol{\Omega}^0\|}{12} \leq \frac{1}{8\sqrt{2}}$ , then it follows immediately that  $\|\widehat{\boldsymbol{\Omega}}_{\tilde{A}} - \boldsymbol{\Omega}^0\| \leq 12 \|\mathbf{I}_{\tilde{A}, \tilde{A}}^{-1/2} \text{vec}_{\tilde{A}}(\boldsymbol{\Sigma}^0 - \mathbf{S})\|_2$ . If  $\frac{\|\widehat{\boldsymbol{\Omega}}_{\tilde{A}} - \boldsymbol{\Omega}^0\|}{12} > \frac{1}{8\sqrt{2}}$ , then  $\frac{1}{8\sqrt{2}} \leq \|\mathbf{I}_{\tilde{A}, \tilde{A}}^{-1/2} \text{vec}(\boldsymbol{\Sigma}^0 - \mathbf{S})\|_2$ , which does not happen on the event  $\{\|\mathbf{I}_{\tilde{A}, \tilde{A}}^{-1/2} \text{vec}_{\tilde{A}}(\boldsymbol{\Sigma}^0 - \mathbf{S})\|_2 < \frac{1}{8\sqrt{2}}\}$ .

Moreover, by property of exponential family [2],  $\text{Var}(\text{vec}_{\tilde{A}}(\boldsymbol{\Sigma}^0 - \mathbf{S})) = 4n^{-1} \mathbf{I}_{\tilde{A}, \tilde{A}}$ . Thus,  $\text{Var}(\mathbf{I}_{\tilde{A}, \tilde{A}}^{-1/2} \text{vec}_{\tilde{A}}(\boldsymbol{\Sigma}^0 - \mathbf{S})) = 4n^{-1} \mathbf{I}_{|\tilde{A}| \times |\tilde{A}|}$ . This, combined with Lemma 3, implies that

$$\|\mathbf{I}_{\tilde{A}, \tilde{A}}^{-1/2} \text{vec}_{\tilde{A}}(\boldsymbol{\Sigma}^0 - \mathbf{S})\|_2 \leq \sqrt{|\tilde{A}|} \|\mathbf{I}_{\tilde{A}, \tilde{A}}^{-1/2} \text{vec}_{\tilde{A}}(\boldsymbol{\Sigma}^0 - \mathbf{S})\|_\infty = O_p \left( \sqrt{\frac{|\tilde{A}| \log p}{n}} \right) \quad (\text{B.16})$$

on the event that  $\{\|\mathbf{I}_{\tilde{A}, \tilde{A}}^{-1/2} \text{vec}_{\tilde{A}}(\boldsymbol{\Sigma}^0 - \mathbf{S})\|_2 < \frac{1}{8\sqrt{2}}\}$ . This event, on the other hand, happens with probability tending to 1 by the assumption that  $\frac{|\tilde{A}| \log p}{n} \rightarrow 0$ . This completes the proof.

**Lemma 6** (*Selection consistency*) If  $K = |A^0|$ ,  $\tau \leq \frac{\lambda_{\min} \min(\sqrt{C_{\min}}, C_{\min}^2)}{12|A^0|}$ , then

$$\begin{aligned} & \max \left( P \left( \widehat{\Omega}^{(0)} \neq \widehat{\Omega}_{A^0} \right), P \left( \widehat{\Omega}^{(1)} \neq \widehat{\Omega}_{A^0 \cup B} \right) \right) \\ & \leq 2 \exp \left( \frac{-nC_{\min}}{2560} + 2 \log p \right) + \exp \left( \frac{-n}{2560 \times 512} + |A^0| \log p \right) \\ & \quad + 2 \exp \left( -n \frac{\min \left( \sqrt{\frac{\min(C_{\min}/512, 3/32)}{48\lambda_{\max}^2(|A^0|+|B|)}}, \lambda_{\max}(\Sigma^0) \right)^2}{18\lambda_{\max}^2(\Sigma^0)} + 2 \log p \right) \rightarrow 0 \quad (\text{B.17}) \end{aligned}$$

as  $n \rightarrow \infty$  under Assumptions 1-2, where  $\widehat{\Omega}^{(0)}$ ,  $\widehat{\Omega}^{(1)}$ , and  $C_{\min}$  are as defined in (1)-(3).

**Proof of Lemma 6:** Let  $\hat{A} = \{(i, j) : |\widehat{\omega}_{ij}^{(1)}| \geq \tau, (i, j) \notin B\}$ . By definition,  $|\hat{A}| \leq |A^0|$ ,  $\hat{A} \cap B = \emptyset$  and  $\sum_{(i,j) \notin \hat{A} \cup B} |\widehat{\omega}_{ij}^{(1)}| \leq \tau(|A^0| - |\hat{A}|)$ . Hence, if  $\hat{A} = A^0$ , then  $\widehat{\Omega}^{(1)} = \widehat{\Omega}_{A^0 \cup B}$ . Suppose  $\hat{A} \neq A^0$ . On event  $\{\hat{A} = A\}$ ; with fixed  $A \neq A^0$ ,  $|A| \leq |A^0|$ , and  $A \cap B = \emptyset$ , we bound the Fisher-norm between  $\widehat{\Omega}_{A \cup B}^{(1)}$  and an approximating point of  $\Omega^0$ ,  $\bar{\Omega}_{A \cup B}^0 = \operatorname{argmin}_{\Omega: \Omega_{(A \cup B)^c} = 0} K(\Omega^0, \Omega)$ . Let  $\bar{\Sigma}_{A \cup B}^0 = (\bar{\Omega}_{A \cup B}^0)^{-1}$ . By the Karush-Kuhn-Tucker conditions,  $\operatorname{vec}_{A \cup B}(\bar{\Sigma}_{A \cup B}^0) = \operatorname{vec}_{A \cup B}(\Sigma^0)$ . Moreover, let  $\bar{\lambda}_{\max} = \max_{A: |A| \leq K, A \cap B = \emptyset} \lambda_{\max}(\bar{\Omega}_{A \cup B}^0)$  and  $\bar{\lambda}_{\min} = \min_{A: |A| \leq K, A \cap B = \emptyset} \lambda_{\min}(\bar{\Omega}_{A \cup B}^0)$ . We also define

$$\mathcal{G} = \left\{ \|\mathbf{S} - \Sigma^0\|_{\infty} \leq \min \left( \frac{1}{16\sqrt{2}\bar{\lambda}_{\max}\sqrt{|A^0|+|B|}}, \sqrt{\frac{\tilde{C}_{\min}}{48\bar{\lambda}_{\max}^2|A^0 \cup B|}}, \lambda_{\max}(\Sigma^0) \right) \right\},$$

where

$$\tilde{C}_{\min} = \min_{A: A \neq A^0, |A|=|A^0|, A \cap B = \emptyset} \min \left( \frac{\max(K(\Omega^0, \bar{\Omega}_{A \cup B}^0), K^2(\Omega^0, \bar{\Omega}_{A \cup B}^0))}{|A^0 \setminus A|}, 1 \right). \quad (\text{B.18})$$

By definition of the CMLE,  $L_n(\widehat{\Omega}^{(1)}) - L_n(\bar{\Omega}_{A \cup B}^0) \geq 0$ , or  $-\log \det \widehat{\Omega}^{(1)} + \log \det \bar{\Omega}_{A \cup B}^0 \leq -\operatorname{tr}((\widehat{\Omega}^{(1)} - \bar{\Omega}_{A \cup B}^0)\mathbf{S})$ . Now let  $\widehat{\Delta} = \widehat{\Omega}_{A \cup B}^{(1)} - \bar{\Omega}_{A \cup B}^0$  and  $\Phi = \widehat{\Omega}^{(1)} - \widehat{\Omega}_{A \cup B}^{(1)}$ , where  $\|\Phi\|_1 = \sum_{(i,j) \notin \hat{A} \cup B} |\widehat{\omega}_{ij}^{(1)}| \leq (|A^0| - |A|)\tau$ . By the Cauchy-Schwarz inequality, the forgoing inequality

becomes

$$\begin{aligned}
& -\log \det(\mathbf{I}_{p \times p} + \sqrt{\bar{\Sigma}_{AUB}^0}(\hat{\Delta} + \Phi)\sqrt{\bar{\Sigma}_{AUB}^0}) + \text{tr}(\sqrt{\bar{\Sigma}_{AUB}^0}(\hat{\Delta} + \Phi)\sqrt{\bar{\Sigma}_{AUB}^0}) \\
& \leq \text{tr}((\hat{\Delta} + \Phi)(\bar{\Sigma}_{AUB}^0 - \mathbf{S})) = \text{vec}_A(\hat{\Delta})^\top \text{vec}_A(\bar{\Sigma}_{AUB}^0 - \mathbf{S}) + \text{tr}(\Phi(\bar{\Sigma}_{AUB}^0 - \mathbf{S})) \\
& = (\bar{\mathbf{I}}_{AUB,AUB}^{1/2} \text{vec}_{AUB}(\hat{\Delta}))^\top \bar{\mathbf{I}}_{AUB,AUB}^{-1/2} \text{vec}_{AUB}(\bar{\Sigma}_{AUB}^0 - \mathbf{S}) + \text{tr}(\Phi(\bar{\Sigma}_{AUB}^0 - \mathbf{S})) \\
& \leq \left\| \sqrt{\bar{\Sigma}_{AUB}^0} \hat{\Delta} \sqrt{\bar{\Sigma}_{AUB}^0} \right\|_F \left\| \bar{\mathbf{I}}_{AUB,AUB}^{-1/2} \text{vec}_{AUB}(\bar{\Sigma}_{AUB}^0 - \mathbf{S}) \right\|_2 + \tau(|A^0| - |A|) \|\bar{\Sigma}_{AUB}^0 - \mathbf{S}\|_\infty \\
& \leq \left\| \sqrt{\bar{\Sigma}_{AUB}^0} \hat{\Delta} \sqrt{\bar{\Sigma}_{AUB}^0} \right\|_F \lambda_{\max}(\bar{\Omega}_{AUB}^0) \sqrt{|A \cup B|} \|\Sigma^0 - \mathbf{S}\|_\infty \\
& \quad + (2\lambda_{\max}(\Sigma^0) + \lambda_{\max}(\bar{\Sigma}_{AUB}^0)) \tau K \\
& \leq \bar{\lambda}_{\max} \sqrt{|A^0 \cup B|} \left\| \sqrt{\bar{\Sigma}_{AUB}^0} \hat{\Delta} \sqrt{\bar{\Sigma}_{AUB}^0} \right\|_F \|\Sigma^0 - \mathbf{S}\|_\infty + 3\bar{\lambda}_{\min}^{-1} \tau K \tag{B.19}
\end{aligned}$$

on the event  $\mathcal{G}$ , where  $\bar{\mathbf{I}}_{AUB,AUB} = [\bar{\Sigma}_{AUB,AUB}^0 \otimes_s \bar{\Sigma}_{AUB,AUB}^0]_{AUB,AUB}$ . On the other hand, by Lemma 4,

$$\begin{aligned}
& -\log \det(\mathbf{I}_{p \times p} + \sqrt{\bar{\Sigma}_{AUB}^0}(\hat{\Delta} + \Phi)\sqrt{\bar{\Sigma}_{AUB}^0}) + \text{tr}(\sqrt{\bar{\Sigma}_{AUB}^0}(\hat{\Delta} + \Phi)\sqrt{\bar{\Sigma}_{AUB}^0}) \\
& \geq \min \left( \frac{\|\sqrt{\bar{\Sigma}_{AUB}^0}(\hat{\Delta} + \Phi)\sqrt{\bar{\Sigma}_{AUB}^0}\|_F}{8\sqrt{2}}, \frac{\|\sqrt{\bar{\Sigma}_{AUB}^0}(\hat{\Delta} + \Phi)\sqrt{\bar{\Sigma}_{AUB}^0}\|_F^2}{12} \right) \\
& \geq \min \left( \frac{\|\sqrt{\bar{\Sigma}_{AUB}^0} \hat{\Delta} \sqrt{\bar{\Sigma}_{AUB}^0}\|_F}{8\sqrt{2}}, \frac{\|\sqrt{\bar{\Sigma}_{AUB}^0} \hat{\Delta} \sqrt{\bar{\Sigma}_{AUB}^0}\|_F^2}{24} \right) \\
& \quad - \max \left( \frac{(|A^0| - |A|)\lambda_{\max}(\bar{\Sigma}_{AUB}^0)\tau}{8\sqrt{2}}, \frac{(|A^0| - |A|)^2 \lambda_{\max}^2(\bar{\Sigma}_{AUB}^0)\tau^2}{12} \right) \\
& \geq \min \left( \frac{\|\sqrt{\bar{\Sigma}_{AUB}^0} \hat{\Delta} \sqrt{\bar{\Sigma}_{AUB}^0}\|_F}{8\sqrt{2}}, \frac{\|\sqrt{\bar{\Sigma}_{AUB}^0} \hat{\Delta} \sqrt{\bar{\Sigma}_{AUB}^0}\|_F^2}{24} \right) - \frac{\lambda_{\max}(\bar{\Sigma}_{AUB}^0)K\tau}{8}
\end{aligned}$$

where the last two inequalities use that  $\|\mathbf{M}_1 + \mathbf{M}_2\|_F^2 \geq 2^{-1}\|\mathbf{M}_1\|_F^2 - \|\mathbf{M}_2\|_F^2$ ,  $\|\sqrt{\bar{\Sigma}_{AUB}^0} \Phi \sqrt{\bar{\Sigma}_{AUB}^0}\|_F^2 \leq \lambda_{\max}^2(\bar{\Sigma}_{AUB}^0) \|\Phi\|_F^2 \leq \lambda_{\max}^2(\bar{\Sigma}_{AUB}^0) \|\Phi\|_1^2 \leq \lambda_{\max}^2(\bar{\Sigma}_{AUB}^0) (|A^0| - |A|)^2 \tau^2$ , and  $\min(a - b, c - d) \geq$

$\min(a, c) - \max(b, d)$ . Combining this with (B.19), we obtain

$$\begin{aligned} & \bar{\lambda}_{\max} \sqrt{|A^0 \cup B|} \left\| \sqrt{\bar{\Sigma}_{AUB}^0} \hat{\Delta} \sqrt{\bar{\Sigma}_{AUB}^0} \right\|_F \|\Sigma^0 - \mathbf{S}\|_{\infty} + 4\bar{\lambda}_{\min}^{-1} \tau K \\ & \geq \min \left( \frac{\left\| \sqrt{\bar{\Sigma}_{AUB}^0} \hat{\Delta} \sqrt{\bar{\Sigma}_{AUB}^0} \right\|_F}{8\sqrt{2}}, \frac{\left\| \sqrt{\bar{\Sigma}_{AUB}^0} \hat{\Delta} \sqrt{\bar{\Sigma}_{AUB}^0} \right\|_F^2}{24} \right), \end{aligned}$$

which implies that

$$\left\| \sqrt{\bar{\Sigma}_{AUB}^0} \hat{\Delta} \sqrt{\bar{\Sigma}_{AUB}^0} \right\|_F \leq 24\bar{\lambda}_{\max} \sqrt{|A^0 \cup B|} \|\mathbf{S} - \Sigma^0\|_{\infty} + 4\sqrt{6\bar{\lambda}_{\min}^{-1} \tau K},$$

on the event  $\{\hat{A} = A\} \cap \mathcal{G}$ . Next, note that

$$\begin{aligned} & \frac{2}{n} \left( L_n(\hat{\Omega}^{(1)}) - L_n(\Omega^0) \right) + 2 \left( L(\Omega^0) - L(\bar{\Omega}_{AUB}^0) \right) \\ & = \frac{2}{n} \left( L_n(\hat{\Omega}^{(1)}) - L_n(\bar{\Omega}_{AUB}^0) \right) + \text{tr} \left( (\Omega^0 - \bar{\Omega}_{AUB}^0)(\mathbf{S} - \Sigma^0) \right) \\ & = 2 \left( L(\hat{\Omega}^{(1)}) - L(\bar{\Omega}_{AUB}^0) \right) + \text{tr} \left( (\mathbf{S} - \bar{\Sigma}_{AUB}^0)(\hat{\Omega}^{(1)} - \bar{\Omega}_{AUB}^0) \right) + \text{tr} \left( (\Omega^0 - \bar{\Omega}_{AUB}^0)(\mathbf{S} - \Sigma^0) \right) \\ & \leq \text{tr} \left( (\mathbf{S} - \bar{\Sigma}_{AUB}^0)(\hat{\Omega}^{(1)} - \hat{\Omega}_{AUB}^{(1)}) \right) + \text{tr} \left( (\mathbf{S} - \Sigma^0)(\hat{\Omega}_{AUB}^{(1)} - \bar{\Omega}_{AUB}^0) \right) \\ & \quad + \text{tr} \left( (\Omega^0 - \bar{\Omega}_{AUB}^0)(\mathbf{S} - \Sigma^0) \right) \tag{B.20} \end{aligned}$$

For the first two terms, using  $\tau \leq \frac{\bar{\lambda}_{\min} \min(\sqrt{\tilde{C}_{\min}}, \tilde{C}_{\min}^2)}{12|A^0|}$  and  $\|\mathbf{S} - \Sigma^0\|_{\infty} \leq \sqrt{\frac{\tilde{C}_{\min}}{48\bar{\lambda}_{\max}^2(|A^0| + |B|)}}$ , we have that on the event  $\mathcal{G}$

$$\begin{aligned} & \text{tr} \left( (\mathbf{S} - \Sigma^0)(\hat{\Omega}_{AUB}^{(1)} - \bar{\Omega}_{AUB}^0) \right) + \text{tr} \left( (\mathbf{S} - \bar{\Sigma}_{AUB}^0)(\hat{\Omega}^{(1)} - \hat{\Omega}_{AUB}^{(1)}) \right) \\ & \leq \left\| \sqrt{\bar{\Sigma}_{AUB}^0} \hat{\Delta} \sqrt{\bar{\Sigma}_{AUB}^0} \right\|_F \left\| \bar{\mathbf{I}}_{AUB, AUB}^{-1/2} \text{vec}_{AUB}(\mathbf{S} - \Sigma^0) \right\|_2 + \tau K \|\mathbf{S} - \bar{\Sigma}_{AUB}^0\|_{\infty} \\ & \leq 24 \min \left( \bar{\lambda}_{\max}^2 |A^0 \cup B| \|\mathbf{S} - \Sigma^0\|_{\infty}^2, \frac{\bar{\lambda}_{\max} \sqrt{|A^0 \cup B|} \|\mathbf{S} - \Sigma^0\|_{\infty}}{16\sqrt{2}} \right) \\ & \quad + \frac{\sqrt{3\bar{\lambda}_{\min}^{-1} \tau K}}{4} + 3\bar{\lambda}_{\min}^{-1} \tau K \\ & \leq 2^{-1} K(\Omega^0, \bar{\Omega}_{AUB}^0) + 2^{-1} K(\Omega^0, \bar{\Omega}_{AUB}^0) = L(\Omega^0) - L(\bar{\Omega}_{AUB}^0), \end{aligned}$$

which, together with (B.20), implies that for any  $A \neq A^0, |A| \leq K, A \cap B = \emptyset$ , we have that

$$\left\{ L_n(\widehat{\Omega}^{(1)}) - L_n(\Omega^0) \geq 0; \hat{A} = A; \mathcal{G} \right\} \subseteq \left\{ \text{tr} \left( (\Omega^0 - \bar{\Omega}_{A \cup B}^0)(\mathbf{S} - \Sigma^0) \right) \geq L(\Omega^0) - L(\bar{\Omega}_{A \cup B}^0) \right\}$$

Hence,

$$\begin{aligned} \mathbb{P} \left( \widehat{\Omega}^{(1)} \neq \widehat{\Omega}_{A^0 \cup B} \right) &\leq \sum_{A: A \neq A^0, |A| \leq K, A \cap B = \emptyset} \mathbb{P} \left( L_n(\widehat{\Omega}^{(1)}) - L_n(\Omega^0) \geq 0; \hat{A} = A; \mathcal{G} \right) + \mathbb{P}(\mathcal{G}^c) \\ &\leq \sum_{A: A \neq A^0, |A| \leq K, A \cap B = \emptyset} \mathbb{P} \left( \text{tr} \left( (\Omega^0 - \bar{\Omega}_{A \cup B}^0)(\mathbf{S} - \Sigma^0) \right) \geq L(\Omega^0) - L(\bar{\Omega}_{A \cup B}^0) \right) + \mathbb{P}(\mathcal{G}^c), \end{aligned}$$

where the first probability can be further bounded by applying Lemmas 3 and 4.

$$\begin{aligned} &\sum_{A: A \neq A^0, |A| \leq K, A \cap B = \emptyset} \mathbb{P} \left( \text{tr} \left( (\Omega^0 - \bar{\Omega}_{A \cup B}^0)(\mathbf{S} - \Sigma^0) \right) \geq L(\Omega^0) - L(\bar{\Omega}_{A \cup B}^0) \right) \\ &\leq \sum_{A: A \neq A^0, |A| \leq K, A \cap B = \emptyset} \exp \left( \frac{-n 10^{-1} K^2 (\Omega^0, \bar{\Omega}_{A \cup B}^0)}{\|\bar{\Omega}_{A \cup B}^0 - \Omega^0\|^2 + K(\Omega^0, \bar{\Omega}_{A \cup B}^0) \|\bar{\Omega}_{A \cup B}^0 - \Omega^0\|} \right) \\ &\leq \sum_{A: A \neq A^0, |A| \leq K, A \cap B = \emptyset} \exp \left( \frac{-n \min(128^{-1}, K(\Omega^0, \bar{\Omega}_{A \cup B}^0))}{20} \right) \\ &\leq \sum_{A: A \neq A^0, |A| \leq K, A \cap B = \emptyset, K(\Omega^0, \bar{\Omega}_{A \cup B}^0) \leq 1} \exp \left( \frac{-n K(\Omega^0, \bar{\Omega}_{A \cup B}^0)}{2560} \right) \\ &\quad + \sum_{A: A \neq A^0, |A| \leq K, A \cap B = \emptyset, K(\Omega^0, \bar{\Omega}_{A \cup B}^0) > 1} \exp \left( \frac{-n}{2560} \right) \\ &\leq \sum_{j=1}^{|A^0|} \sum_{i=1}^{|A^0|-j} \binom{|A^0|}{j} \binom{p-|A^0|}{i} \exp \left( \frac{-nj \tilde{C}_{\min}}{2560} \right) + \exp \left( \frac{-n}{2560} + |A^0| \log p \right) \\ &\leq \sum_{j=1}^{|A^0|} \exp \left( \frac{-nj \tilde{C}_{\min}}{2560} + 2j \log p \right) + \exp \left( \frac{-n}{2560} + |A^0| \log p \right) \\ &\leq 2 \exp \left( \frac{-n \tilde{C}_{\min}}{2560} + 2 \log p \right) + \exp \left( \frac{-n}{2560} + |A^0| \log p \right) \rightarrow 0 \end{aligned}$$

as  $n \rightarrow \infty$ , provided that  $\frac{|A^0| \log p}{n} \leq 3000^{-1}$  and  $\tilde{C}_{\min} \geq 3000 \frac{\log p}{n}$ .

To bound  $\mathbb{P}(\mathcal{G}^c)$ , we apply Lemma 3 with  $\nu = \min \left( \frac{1}{16\sqrt{2}\bar{\lambda}_{\max}\sqrt{|A^0|+|B|}}, \sqrt{\frac{\tilde{C}_{\min}}{48\lambda_{\max}^2|A^0\cup B|}}, \lambda_{\max}(\boldsymbol{\Sigma}^0) \right)$  and get

$$\begin{aligned} \mathbb{P}(\mathcal{G}^c) &\leq \mathbb{P}(\|\mathbf{S} - \boldsymbol{\Sigma}^0\|_{\infty} \geq \nu) \leq 2 \exp \left( -n \frac{\nu^2}{9\lambda_{\max}^2(\boldsymbol{\Sigma}^0) + 8\nu\lambda_{\max}(\boldsymbol{\Sigma}^0)} + 2 \log p \right) \\ &\leq 2 \exp \left( -n \frac{\nu^2}{18\lambda_{\max}^2(\boldsymbol{\Sigma}^0)} + 2 \log p \right) \rightarrow 0, \end{aligned}$$

provided that  $\tilde{C}_{\min} \geq 2000 \frac{\bar{\lambda}_{\max}^2}{\lambda_{\min}^2(\boldsymbol{\Omega}^0)} \frac{(|A^0|+|B|)\log p}{n}$  and  $\frac{\bar{\lambda}_{\max}^2}{\lambda_{\min}^2(\boldsymbol{\Omega}^0)} \frac{(|A^0|+|B|)\log p}{n} \leq 18000$ . Combining, we obtain

$$\begin{aligned} P \left( \widehat{\boldsymbol{\Omega}}^{(1)} \neq \widehat{\boldsymbol{\Omega}}_{A^0 \cup B} \right) &\leq \exp \left( \frac{-n\tilde{C}_{\min}}{2560} + 2 \log p \right) + \exp \left( \frac{-n}{2560} + |A^0| \log p \right) \\ &+ \exp \left( -n \frac{\left( \min \left( \sqrt{\frac{\min(\tilde{C}_{\min}, 3/32)}{48\lambda_{\max}^2(|A^0|+|B|)}}, \lambda_{\max}(\boldsymbol{\Sigma}^0) \right)^2}{18\lambda_{\max}^2(\boldsymbol{\Sigma}^0)} + 2 \log p \right) \right) \end{aligned}$$

For  $\mathbb{P} \left( \widehat{\boldsymbol{\Omega}}^{(0)} \neq \widehat{\boldsymbol{\Omega}}_{A^0} \right)$ , we let  $B = \emptyset$  and a similar bound can be established. Moreover, by Lemma 4, it is easy to see that  $\max(K(\boldsymbol{\Omega}^0, \boldsymbol{\Omega}), K^2(\boldsymbol{\Omega}^0, \boldsymbol{\Omega})) \geq \frac{\|\boldsymbol{\Omega}^0 - \boldsymbol{\Omega}\|^2}{512}$  for any  $\boldsymbol{\Omega}$ . Consequently,  $\tilde{C}_{\min} \geq \frac{C_{\min}}{512}$ . Thus, the bound in (B.17) is established. This completes the proof.

**Lemma 7** *Let  $\boldsymbol{\Gamma}_k = (\gamma_{k1}, \dots, \gamma_{km}) \in \mathbb{R}^m$ ;  $k = 1, \dots, n$  be iid random vectors with  $\text{Var}(\boldsymbol{\gamma}_1) = \mathbf{I}_{m \times m}$ . If  $m$  is fixed, then*

$$n^{-1} \left\| \sum_{k=1}^n \boldsymbol{\gamma}_k \right\|_2^2 \xrightarrow{d} \chi_m^2, \text{ as } n \rightarrow \infty. \quad (\text{B.21})$$

*Otherwise, if  $\max(m, m_2 m/n, m_3/n, m_3 m^{3/2}/n^2) \rightarrow 0$ , where  $m_j = \max_{1 \leq i \leq m} \mathbb{E} \gamma_{1i}^{2j}$ ;  $j = 2, 3$ , then*

$$\frac{\left\| \sum_{k=1}^n \boldsymbol{\gamma}_k \right\|_2^2 - nm}{n\sqrt{2m}} \xrightarrow{d} N(0, 1), \text{ as } n \rightarrow \infty. \quad (\text{B.22})$$

**Proof of Lemma 7:** If  $m$  is fixed, then (B.21) follows from the central limit theorem and the continuous mapping theorem.

For (B.22), let  $\mathbf{\Gamma}_k = \sum_{j=1}^k \boldsymbol{\gamma}_j$ ;  $k = 1, \dots, n$  be a partial sum of  $k$  iid  $m$ -dimensional vectors  $\boldsymbol{\gamma}_j$ 's. Next we apply Theorem 18.1 of [1] to show that  $\frac{\|\mathbf{\Gamma}_n\|_2^2 - nm}{n\sqrt{2m}} \rightarrow N(0, 1)$  for triangular arrays of martingale differences  $\{\eta_{n,k} = \frac{\|\mathbf{\Gamma}_k\|_2^2 - \|\mathbf{\Gamma}_{k-1}\|_2^2 - m}{n\sqrt{2m}} = \frac{\|\boldsymbol{\gamma}_k\|_2^2 - m + 2\boldsymbol{\gamma}_k^\top \mathbf{\Gamma}_{k-1}}{n\sqrt{2m}}\}$ . Towards this end, we verify that

$$\sum_{k=1}^n \mathbb{E}(\eta_{n,k}^2 | \boldsymbol{\gamma}_1, \dots, \boldsymbol{\gamma}_{k-1}) \xrightarrow{P} 1, \quad \sum_{k=1}^n \mathbb{E}|\eta_{n,k}|^3 \rightarrow 0. \quad (\text{B.23})$$

For the first condition of (B.23), we compute  $\mathbb{E}$  and  $\text{Var}$  of  $\mathbb{E}(\eta_{n,k}^2 | \boldsymbol{\gamma}_1, \dots, \boldsymbol{\gamma}_{k-1})$ . Note that  $\boldsymbol{\gamma}_1, \dots, \boldsymbol{\gamma}_m$  are iid vectors with  $\text{Var}(\boldsymbol{\gamma}_m) = \mathbf{I}_{m \times m}$ ,  $\mathbb{E}\mathbf{\Gamma}_{k-1} = 0$ , and  $\mathbb{E}\|\mathbf{\Gamma}_{k-1}\|_2^2 = (k-1)m$ . Then, for each  $k = 1, \dots, n$ ,  $\mathbb{E}\mathbb{E}(\eta_{n,k}^2 | \boldsymbol{\gamma}_1, \dots, \boldsymbol{\gamma}_{k-1})$  becomes

$$\begin{aligned} & (2mn^2)^{-1} \left( \mathbb{E}(\|\boldsymbol{\gamma}_k\|_2^2 - m)^2 + 4\mathbb{E}((\|\boldsymbol{\gamma}_k\|_2^2 - m)\boldsymbol{\gamma}_k)^\top \mathbb{E}\mathbf{\Gamma}_{k-1} + 4\mathbb{E}\mathbb{E}((\boldsymbol{\gamma}_k^\top \mathbf{\Gamma}_{k-1})^2 | \boldsymbol{\gamma}_1, \dots, \boldsymbol{\gamma}_{k-1}) \right) \\ & = (2mn^2)^{-1} \left( \text{Var}(\|\boldsymbol{\gamma}_k\|_2^2) + 4\mathbb{E}\|\mathbf{\Gamma}_{k-1}\|_2^2 \right) = (2mn^2)^{-1} \left( \text{Var}(\|\boldsymbol{\gamma}_k\|_2^2) + 4(k-1)m \right), \end{aligned}$$

which, after summing over  $k = 1, \dots, n$ , leads to

$$\sum_{k=1}^n \frac{2(k-1)}{n^2} \leq \mathbb{E} \left( \sum_{k=1}^n \mathbb{E}(\eta_{n,k}^2 | \boldsymbol{\gamma}_1, \dots, \boldsymbol{\gamma}_{k-1}) \right) \leq \frac{mm_2}{2n} + \sum_{k=1}^n \frac{2(k-1)}{n^2},$$

where  $\text{Var}(\|\boldsymbol{\gamma}_k\|_2^2) \leq m^2 m_2$ ;  $k = 1, \dots, n$ . Consequently,  $\left| \mathbb{E} \left( \sum_{k=1}^n \mathbb{E}(\eta_{n,k}^2 | \boldsymbol{\gamma}_1, \dots, \boldsymbol{\gamma}_{k-1}) \right) - 1 \right| \leq \frac{2}{n} + \frac{mm_2}{2n}$ . Let  $\mathbf{a} = \mathbb{E}((\|\boldsymbol{\gamma}_1\|_2^2 - m)\boldsymbol{\gamma}_1)$ . Similarly, using an inequality  $(a_1 + a_2 + a_3)^2 \leq$

$3(a_1^2 + a_2^2 + a_3^2)$  for real numbers  $a_j; j = 1, \dots, 3$ .

$$\begin{aligned}
& \text{Var} \left( \sum_{k=1}^n \mathbb{E}(\eta_{n,k}^2 \mid \gamma_1, \dots, \gamma_{k-1}) \right) = \frac{4}{m^2 n^4} \text{Var} \left( \sum_{k=1}^n (\mathbf{a}^\top \boldsymbol{\Gamma}_{k-1} + \|\boldsymbol{\Gamma}_{k-1}\|_2^2) \right) \\
& = \frac{4}{m^2 n^4} \text{Var} \left( \sum_{k=1}^n (n-k) (\mathbf{a}^\top \boldsymbol{\gamma}_k + \|\boldsymbol{\gamma}_k\|_2^2) + 2 \sum_{k < k'} (n - (k \vee k')) \boldsymbol{\gamma}_k^\top \boldsymbol{\gamma}_{k'} \right) \\
& \leq \frac{12}{m^2 n^4} \left[ \text{Var} \left( \sum_{k=1}^n (n-k) \mathbf{a}^\top \boldsymbol{\gamma}_k \right) + \text{Var} \left( \sum_{k=1}^n (n-k) \|\boldsymbol{\gamma}_k\|_2^2 \right) \right. \\
& \quad \left. + \text{Var} \left( \sum_{k < k'} (n - (k \vee k')) \boldsymbol{\gamma}_k^\top \boldsymbol{\gamma}_{k'} \right) \right] \equiv \frac{12}{m^2 n^4} [T_1 + T_2 + T_3]. \tag{B.24}
\end{aligned}$$

For  $T_1$ , note that  $\|\mathbf{a}\|_2^2 \leq \sum_{k=1}^m \mathbb{E}^2((\|\boldsymbol{\gamma}_1\|_2^2 - m)\boldsymbol{\gamma}_{1k}) \leq \sum_{k=1}^m \mathbb{E}((\|\boldsymbol{\gamma}_1\|_2^2 - m)^2) \mathbb{E}\boldsymbol{\gamma}_{1k}^2 \leq m^3 m_2$ .

Then

$$\begin{aligned}
\text{Var} \left( \sum_{k=1}^n (n-k) \mathbf{a}^\top \boldsymbol{\gamma}_k \right) & = \sum_{k=1}^n (n-k)^2 \mathbb{E}(\mathbf{a}^\top \boldsymbol{\gamma}_k)^2 = \sum_{k=1}^n (n-k)^2 \sum_{j=1}^m a_j^2 \mathbb{E}\boldsymbol{\gamma}_{kj}^2 \\
& = \frac{\|\mathbf{a}\|_2^2}{6} (n-1)n(2n-1) \leq n^3 m^3 m_2.
\end{aligned}$$

For  $T_2$ , note that  $\text{Var}(\sum_{k=1}^n (n-k) \|\boldsymbol{\gamma}_k\|_2^2) \leq \sum_{k=1}^n (n-k)^2 m^2 m_2 = \frac{1}{6} (n-1)n(2n-1) m^2 m_2$ .

To bound  $T_3$ , note that, for  $k \neq k'$  and  $j \neq j'$ ,  $\mathbb{E}(\boldsymbol{\gamma}_k^\top \boldsymbol{\gamma}_{k'} \boldsymbol{\gamma}_j^\top \boldsymbol{\gamma}_{j'}) = \mathbb{I}(\{j, j'\} = \{k, k'\}) \mathbb{E}(\boldsymbol{\gamma}_k^\top \boldsymbol{\gamma}_{k'})^2 = \mathbb{I}(\{j, j'\} = \{k, k'\}) m$ , yielding that

$$\text{Var} \left( \sum_{k < k'} (n - (k \vee k')) \boldsymbol{\gamma}_k^\top \boldsymbol{\gamma}_{k'} \right) = \sum_{k < k'} (n - (k \vee k'))^2 \mathbb{E}(\boldsymbol{\gamma}_k^\top \boldsymbol{\gamma}_{k'})^2 \leq n^4 m.$$

Combining (B.24) with the bounds of  $T_1 - T_3$ , we obtain

$$\text{Var} \left( \sum_{k=1}^n \mathbb{E}(\eta_{n,k}^2 \mid \gamma_1, \dots, \gamma_{k-1}) \right) \leq \frac{12(n^3 m^3 m_2 + n^3 m^2 m_2 + n^4 m)}{m^2 n^4}.$$

Hence the first condition of (B.23) is implied by the assumption that  $mm_2/n \rightarrow 0$  and



$m \rightarrow \infty$ .

For the second condition of (B.23), note that  $\mathbb{E}|\eta_{n,k}|^3 = \mathbb{E}\left(\left|\|\boldsymbol{\gamma}_k\|_2^2 - m + 2\boldsymbol{\gamma}_k^\top \boldsymbol{\Gamma}_{k-1}\right|^3\right)$  is bounded by

$$\begin{aligned} & 4\mathbb{E}\left(\left|\|\boldsymbol{\gamma}_k\|_2^2 - m\right|^3\right) + 16\mathbb{E}\left(\left|\boldsymbol{\gamma}_k^\top \boldsymbol{\Gamma}_{k-1}\right|^3\right) \leq \mathbb{E}\left(\|\boldsymbol{\gamma}_k\|_2^6\right) + \sqrt{\mathbb{E}\left(\left(\boldsymbol{\gamma}_k^\top \boldsymbol{\Gamma}_{k-1}\right)^6\right)} \\ & \leq m^3 m_3 + \sqrt{(k-1)^3 m^3 m_3 + (k-1)^2 m^3 m_2 m_3 + (k-1)m^3 m_3^2} \\ & \leq m^3 m_3 + k^{3/2} m^{3/2} m_3^{1/2} + km^{3/2} m_2^{1/2} m_3^{1/2} + k^{1/2} m^{3/2} m_3. \end{aligned}$$

Summing over  $k$ ,  $\frac{\sum_{k=1}^n \mathbb{E}\left(\left|\|\boldsymbol{\gamma}_k\|_2^2 - m + 2\boldsymbol{\gamma}_k^\top \boldsymbol{\Gamma}_{k-1}\right|^3\right)}{n^3 m^{3/2}}$  is upper bounded by

$$\begin{aligned} & \frac{\left(nm^3 m_3 + n^{5/2} m^{3/2} m_3^{1/2} + n^2 m^{3/2} m_2^{1/2} m_3^{1/2} + n^{3/2} m^{3/2} m_3\right)}{n^3 m^{3/2}} \\ & = \frac{m^{3/2} m_3}{n^2} + \frac{m_3^{1/2}}{n^{1/2}} + \frac{m_2^{1/2} m_3^{1/2}}{n} + \frac{m_3}{n^{3/2}} \rightarrow 0, \end{aligned}$$

provided that  $\max(m_2 m/n, m_3/n, m_3 m^{3/2}/n^2) \rightarrow 0$ . Thus the second condition in (B.23) is met. As a consequence of Theorem 18.1 of [1], the desired asymptotic normality is established. This completes the proof.

**Lemma 8** *Let  $\mathbf{X} \sim N(\mathbf{0}, \boldsymbol{\Sigma}^0)$  and  $\gamma = \text{tr}(\mathbf{X}\mathbf{X}^\top - \boldsymbol{\Sigma}^0)\mathbf{T}$  with  $\mathbf{T}$  a symmetric matrix. Then*

$$\mathbb{E}(\gamma^{2m}) \leq (2m-1)! 2^{m-1} (\mathbb{E}(\gamma^2))^m \text{ for any integer } m \geq 1. \quad (\text{B.25})$$

**Proof of Lemma 8:** As in (B.8) and (B.10), we expand the moment generating function of  $\gamma$ :  $M_\gamma(\lambda) = \mathbb{E} \exp(\lambda\gamma) = \lambda^2 \|\sqrt{\boldsymbol{\Sigma}^0} \mathbf{T} \sqrt{\boldsymbol{\Sigma}^0}\|_F^2 + (1/2) \sum_{l=3}^{\infty} l^{-1} \lambda^l \text{tr}[(2\mathbf{T}\boldsymbol{\Sigma}^0)^l]$  for any  $|\lambda| < \|\sqrt{\boldsymbol{\Sigma}^0} \mathbf{T} \sqrt{\boldsymbol{\Sigma}^0}\|_F/2$ . Direct computation of high-order derivatives of  $M_\gamma(\lambda)$  in  $\lambda$  yields that  $\mathbb{E}(\gamma^{2m}) = (2m-1)! 2^{2m-1} \text{tr}\left((\mathbf{T}\boldsymbol{\Sigma}^0)^{2m}\right)$  for any integer  $m \geq 1$ . An application of  $\text{tr}\left((\mathbf{T}\boldsymbol{\Sigma}^0)^{2m}\right) \leq \|\sqrt{\boldsymbol{\Sigma}^0} \mathbf{T} \sqrt{\boldsymbol{\Sigma}^0}\|_F^{2m}$  yields that  $\mathbb{E}(\gamma^{2m}) \leq (2m-1)! 2^{2m-1} \|\sqrt{\boldsymbol{\Sigma}^0} \mathbf{T} \sqrt{\boldsymbol{\Sigma}^0}\|_F^{2m} = (2m-1)! 2^{m-1} (\mathbb{E}(\gamma^2))^m$ . This completes the proof.

**Proof of Lemma 9:** Let  $\widehat{\Delta}_{\tilde{A}} = \widehat{\Omega}_{\tilde{A}} - \Omega^0$  for any  $\tilde{A} \supseteq A^0$ . Applying Lemma 5 to  $\widehat{\Delta}_{\tilde{A}}$  and  $\widehat{\Delta}_{A^0}$ , we have that both  $\|\widehat{\Delta}_{\tilde{A}}\|$  and  $\|\widehat{\Delta}_{A^0}\|$  tend to zero in probability as  $n$  goes to infinity. Hence, we could assume throughout the proof that  $\max\left(\|\widehat{\Delta}_{\tilde{A}}\|, \|\widehat{\Delta}_{A^0}\|\right) \leq 1/2$  holds with probability tending to one. Note that  $\Omega^0 = (\Sigma^0)^{-1}$ , and  $\log \det(\widehat{\Omega}_{\tilde{A}}) = \log \det(\mathbf{I}_{p \times p} + \widehat{\Delta}_{\tilde{A}}\Sigma^0) + \log \det(\Omega^0)$ . Then

$$\begin{aligned}
& \log \det(\mathbf{I}_{p \times p} + \widehat{\Delta}_{\tilde{A}}\Sigma^0) \\
&= \log \det(\mathbf{I}_{p \times p} + [\Sigma^0]^{1/2} \widehat{\Delta}_{\tilde{A}} [\Sigma^0]^{1/2}) = \text{tr}(\log(\mathbf{I}_{p \times p} + [\Sigma^0]^{1/2} \widehat{\Delta}_{\tilde{A}} [\Sigma^0]^{1/2})) \\
&= \text{tr} \left( \sum_{i=1}^{\infty} (-1)^{i+1} \frac{([\Sigma^0]^{1/2} \widehat{\Delta}_{\tilde{A}} [\Sigma^0]^{1/2})^i}{i} \right), \\
&= \text{tr}(\widehat{\Delta}_{\tilde{A}}\Sigma^0) - \frac{1}{2} \text{tr}(\widehat{\Delta}_{\tilde{A}}\Sigma^0 \widehat{\Delta}_{\tilde{A}}\Sigma^0) + R_1(\widehat{\Delta}_{\tilde{A}}), \tag{B.26}
\end{aligned}$$

where  $R_1(\widehat{\Delta}_{\tilde{A}}) = \sum_{i=3}^{\infty} \frac{(-1)^{i+1}}{i} \text{tr} \left( (\widehat{\Delta}_{\tilde{A}}\Sigma^0)^i \right)$  and the expansion is valid since  $\|\widehat{\Delta}_{\tilde{A}}\| \leq 1/2 <$

1. As a result,

$$\begin{aligned}
& n^{-1} \left( L_n(\widehat{\Omega}_{\tilde{A}}) - L_n(\Omega^0) \right) \\
&= \frac{1}{2} \text{tr}(\widehat{\Delta}_{\tilde{A}}\Sigma^0) - \frac{1}{4} \text{tr}(\widehat{\Delta}_{\tilde{A}}\Sigma^0 \widehat{\Delta}_{\tilde{A}}\Sigma^0) - \frac{1}{2} \text{tr}(\widehat{\Delta}_{\tilde{A}}\mathbf{S}) + \frac{1}{2} R_1(\widehat{\Delta}_{\tilde{A}}) \\
&= \frac{1}{2} \text{tr}(\widehat{\Delta}_{\tilde{A}}(\Sigma^0 - \mathbf{S})) - \frac{1}{4} \|\widehat{\Delta}_{\tilde{A}}\|^2 + \frac{1}{2} R_1(\widehat{\Delta}_{\tilde{A}}). \tag{B.27}
\end{aligned}$$

Moreover, using the property of the CMLE,  $\widehat{\Delta}_{\tilde{A}}$  satisfies a score equation:  $[-(\widehat{\Delta}_{\tilde{A}} + \Omega^0)^{-1} + \mathbf{S}]_{\tilde{A}} = 0$ . This, in turn, yields that

$$\left[ \Sigma^0 \widehat{\Delta}_{\tilde{A}} \Sigma^0 \right]_{\tilde{A}} = \left[ R_2(\widehat{\Delta}_{\tilde{A}}) + \Sigma^0 - \mathbf{S} \right]_{\tilde{A}}, \tag{B.28}$$

where  $(\widehat{\Delta}_{\tilde{A}} + \Omega^0)^{-1} = \Sigma^0 - \Sigma^0 \widehat{\Delta}_{\tilde{A}} \Sigma^0 + R_2(\widehat{\Delta}_{\tilde{A}})$  is used, and  $R_2(\widehat{\Delta}_{\tilde{A}}) = \Sigma^0 \sum_{i=2}^{\infty} (-1)^i (\widehat{\Delta}_{\tilde{A}} \Sigma^0)^i$ .

By the definition of  $\otimes$  and (B.2), (B.28) can be rewritten in a vector form as

$$2\mathbf{I}_{\tilde{A}, \tilde{A}} \text{vec}_{\tilde{A}}(\widehat{\Delta}_{\tilde{A}}) = \text{vec} \left( R_2(\widehat{\Delta}_{\tilde{A}}) + \Sigma^0 - \mathbf{S} \right). \tag{B.29}$$

Moreover, after taking the inner product with  $\widehat{\Delta}_{\tilde{A}}$  for both sides of (B.28), we obtain

$$\text{tr} \left( \widehat{\Delta}_{\tilde{A}} \Sigma^0 \widehat{\Delta}_{\tilde{A}} \Sigma^0 \right) = \text{tr} \left( \widehat{\Delta}_{\tilde{A}} R_2(\widehat{\Delta}_{\tilde{A}}) \right) + \text{tr} \left( \widehat{\Delta}_{\tilde{A}}(\mathbf{\Lambda}) \right), \tag{B.30}$$

where  $\mathbf{\Lambda} = \Sigma^0 - \mathbf{S}$ . Hence, combining (B.29) and (B.30) with (B.27) yields that

$$\begin{aligned}
& 2n^{-1} \left( L_n(\widehat{\Omega}_{\bar{A}}) - L_n(\Omega^0) \right) = \frac{1}{2} \text{tr} \left( \widehat{\Delta}_{\bar{A}} \Lambda \right) - \frac{1}{2} \text{tr} \left( \widehat{\Delta}_{\bar{A}} R_2(\widehat{\Delta}_{\bar{A}}) \right) + R_1(\widehat{\Delta}_{\bar{A}}) \\
& = \frac{1}{2} \left( \text{vec}_{\bar{A}}(\widehat{\Delta}) \right)^\top \text{vec}_{\bar{A}} \left( \Lambda - R_2(\widehat{\Delta}_{\bar{A}}) \right) + R_1(\widehat{\Delta}_{\bar{A}}) \\
& = \frac{1}{4} \text{vec}_{\bar{A}} \left( \Lambda + R_2(\widehat{\Delta}_{\bar{A}}) \right)^\top \mathbf{I}_{\bar{A},\bar{A}}^{-1} \text{vec}_{\bar{A}} \left( \Lambda - R_2(\widehat{\Delta}_{\bar{A}}) \right) + R_1(\widehat{\Delta}_{\bar{A}}) \\
& = \frac{1}{4} \text{vec}_{\bar{A}}(\Lambda)^\top \mathbf{I}_{\bar{A},\bar{A}}^{-1} \text{vec}_{\bar{A}}(\Lambda) - \frac{1}{4} \text{vec}_{\bar{A}} \left( R_2(\widehat{\Delta}_{\bar{A}}) \right)^\top \mathbf{I}_{\bar{A},\bar{A}}^{-1} \text{vec}_{\bar{A}} \left( R_2(\widehat{\Delta}_{\bar{A}}) \right) + R_1(\widehat{\Delta}_{\bar{A}}).
\end{aligned}$$

Similarly,

$$\begin{aligned}
& 2n^{-1} \left( L_n(\widehat{\Omega}_{A^0}) - L_n(\Omega^0) \right) \\
& = \frac{1}{4} \text{vec}_{A^0}(\Lambda)^\top \mathbf{I}_{A^0,A^0}^{-1} \text{vec}_{A^0}(\Lambda) - \frac{1}{4} \text{vec}_{A^0} \left( R_2(\widehat{\Delta}_{A^0}) \right)^\top \mathbf{I}_{A^0,A^0}^{-1} \text{vec}_{A^0} \left( R_2(\widehat{\Delta}_{A^0}) \right) + R_1(\widehat{\Delta}_{A^0}).
\end{aligned}$$

Combining, we obtain that

$$\begin{aligned}
2 \left( L_n(\widehat{\Omega}_{\bar{A}}) - L_n(\widehat{\Omega}_{A^0}) \right) & = \frac{n}{4} \text{vec}_{\bar{A}}(\Lambda)^\top \mathbf{I}_{B,B}^{-1} \text{vec}_{\bar{A}}(\Lambda) \\
& \quad - \frac{n}{4} \text{vec}_{A^0}(\Lambda)^\top \mathbf{I}_{A^0,A^0}^{-1} \text{vec}_{A^0}(\Lambda) + R(\widehat{\Delta}_{\bar{A}}, \widehat{\Delta}_{A^0}) \quad (\text{B.31})
\end{aligned}$$

where

$$\begin{aligned}
R(\widehat{\Delta}_{\bar{A}}, \widehat{\Delta}_{A^0}) & = nR_1(\widehat{\Delta}_{\bar{A}}) - \frac{n}{4} \text{vec}_{\bar{A}} \left( R_2(\widehat{\Delta}_{\bar{A}}) \right)^\top \mathbf{I}_{\bar{A},\bar{A}}^{-1} \text{vec}_{\bar{A}} \left( R_2(\widehat{\Delta}_{\bar{A}}) \right) \\
& \quad - nR_1(\widehat{\Delta}_{A^0}) + \frac{n}{4} \text{vec}_{A^0} \left( R_2(\widehat{\Delta}_{A^0}) \right)^\top \mathbf{I}_{A^0,A^0}^{-1} \text{vec}_{A^0} \left( R_2(\widehat{\Delta}_{A^0}) \right) \quad (\text{B.32})
\end{aligned}$$

is the remainder to be bounded subsequently. For now, we focus on the leading term in the likelihood ratio expansion. Let  $\boldsymbol{\lambda} = \sqrt{n} \text{vec}_{\bar{A}}(\Sigma^0 - \mathbf{S})$ . Now write  $\mathbf{I}_{\bar{A},\bar{A}}^{-1}$  as

$$\mathbf{I}_{\bar{A},\bar{A}}^{-1} = \begin{pmatrix} \mathbf{J}_{A^0,A^0} & \mathbf{J}_{A^0,B} \\ \mathbf{J}_{B,A^0} & \mathbf{J}_{B,B} \end{pmatrix}. \quad (\text{B.33})$$

Note that  $\mathbf{I}_{A^0,A^0} = [\mathbf{J}^{-1}]_{A^0,A^0} = (\mathbf{J}_{A^0,A^0} - \mathbf{J}_{A^0,B} \mathbf{J}_{B,B}^{-1} \mathbf{J}_{B,A^0})^{-1}$ . Thus,

$$\begin{aligned}
& \frac{n}{4} \text{vec}_{\bar{A}}(\Lambda)^\top \mathbf{I}_{\bar{A},\bar{A}}^{-1} \text{vec}_{\bar{A}}(\Lambda) - \frac{n}{4} \text{vec}_{A^0}(\Lambda)^\top \mathbf{I}_{A^0,A^0}^{-1} \text{vec}_{A^0}(\Lambda) \\
& = \frac{1}{4} \boldsymbol{\lambda}_{\bar{A}}^\top \mathbf{I}_{\bar{A},\bar{A}}^{-1} \boldsymbol{\lambda}_{\bar{A}} - \frac{1}{4} \boldsymbol{\lambda}_{A^0}^\top \mathbf{I}_{A^0,A^0}^{-1} \boldsymbol{\lambda}_{A^0} \\
& = \frac{1}{4} \boldsymbol{\lambda}_{\bar{A}}^\top \mathbf{J} \boldsymbol{\lambda}_{\bar{A}} - \frac{1}{4} \boldsymbol{\lambda}_{A^0}^\top \left( \mathbf{J}_{A^0,A^0} - \mathbf{J}_{A^0,B} \mathbf{J}_{B,B}^{-1} \mathbf{J}_{B,A^0} \right) \boldsymbol{\lambda}_{A^0} \\
& = \frac{1}{4} \left( \mathbf{J}_{B,A^0} \boldsymbol{\lambda}_{A^0} + \mathbf{J}_{\bar{A} \setminus A^0, B \setminus A^0} \boldsymbol{\lambda}_B \right)^\top \mathbf{J}_{A^0 \setminus A^0, B}^{-1} \left( \mathbf{J}_{\bar{A} \setminus A^0, A^0} \boldsymbol{\lambda}_{A^0} + \mathbf{J}_{B \setminus A^0, B} \boldsymbol{\lambda}_B \right) \\
& = \frac{1}{4} \boldsymbol{\lambda}_{\bar{A}}^\top \mathbf{J}_{\bar{A},B} \mathbf{J}_{B,B}^{-1} \mathbf{J}_{\bar{A} \setminus A^0, A} \boldsymbol{\lambda}_{\bar{A}} = \left\| \frac{1}{2} \mathbf{J}_{B,B}^{-1/2} \mathbf{J}_{B,\bar{A}} \sqrt{n} \text{vec}_{\bar{A}}(\Lambda) \right\|_2^2. \quad (\text{B.34})
\end{aligned}$$

This, together with (B.31), implies that

$$2 \left( L_n(\widehat{\Omega}_{\bar{A}}) - L_n(\widehat{\Omega}_{A^0}) \right) = \left\| \frac{1}{2} \mathbf{J}_{B,B}^{-1/2} \mathbf{J}_{B,\bar{A}} \sqrt{n} \text{vec}_{\bar{A}}(\Lambda) \right\|_2^2 + R(\widehat{\Delta}_{\bar{A}}, \widehat{\Delta}_{A^0}), \quad (\text{B.35})$$

Recall from (B.47) that  $\text{Var}\left(\frac{1}{2}\mathbf{J}_{B,B}^{-1/2}\mathbf{J}_{B,\tilde{A}}\sqrt{n}\text{vec}_A(\boldsymbol{\Lambda})\right) = \mathbf{I}_{|B|\times|B|}$ , thus by Lemma 7 and Lemma 8, if  $|B|$  is a fixed constant,  $2\left(L_n(\widehat{\boldsymbol{\Omega}}_{\tilde{A}}) - L_n(\widehat{\boldsymbol{\Omega}}_{A^0})\right) \xrightarrow{P_0} W_{|\tilde{A}\setminus A^0|}$  provided that  $R(\widehat{\boldsymbol{\Delta}}_{\tilde{A}}, \widehat{\boldsymbol{\Delta}}_{A^0}) = o_p(1)$ ; if  $|\tilde{A}\setminus A^0| \rightarrow \infty$ ,  $(2|\tilde{A}\setminus A^0|)^{-1/2}\left(2(L_n(\widehat{\boldsymbol{\Omega}}_{\tilde{A}}) - L_n(\widehat{\boldsymbol{\Omega}}_{A^0})) - |\tilde{A}\setminus A^0|\right) \xrightarrow{P_0} N(0, 1)$  provided that  $R(\widehat{\boldsymbol{\Delta}}_{\tilde{A}}, \widehat{\boldsymbol{\Delta}}_{A^0})/\sqrt{|B|} = o_p(1)$ . Next it remains to prove that the remainder term  $R(\widehat{\boldsymbol{\Delta}}_{\tilde{A}}, \widehat{\boldsymbol{\Delta}}_{A^0})$  satisfies the aforementioned conditions. Toward this end, we bound  $R_1(\widehat{\boldsymbol{\Delta}}_{\tilde{A}}) - R_1(\widehat{\boldsymbol{\Delta}}_{A^0})$  and  $\text{vec}_{\tilde{A}}(R_2(\widehat{\boldsymbol{\Delta}}_{\tilde{A}}))\mathbf{I}_{\tilde{A},\tilde{A}}^{-1}\text{vec}_{\tilde{A}}(R_2(\widehat{\boldsymbol{\Delta}}_{\tilde{A}})) - \text{vec}_{A^0}(R_2(\widehat{\boldsymbol{\Delta}}_{A^0}))\mathbf{I}_{A^0,A^0}^{-1}\text{vec}_{A^0}(R_2(\widehat{\boldsymbol{\Delta}}_{A^0}))$  respectively.

For  $\text{vec}_{\tilde{A}}(R_2(\widehat{\boldsymbol{\Delta}}_{\tilde{A}}))\mathbf{I}_{\tilde{A},\tilde{A}}^{-1}\text{vec}_{\tilde{A}}(R_2(\widehat{\boldsymbol{\Delta}}_{\tilde{A}}))$ , recursively applying  $\|C_1C_2\|_F \leq \|C_1\|_F\|C_2\|_F$  and using the fact that  $\|C_1C_2\|_F \leq \lambda_{\max}(C_2)\|C_1\|_F$  and  $\|C_1C_2\|_F \leq \lambda_{\max}(C_1)\|C_2\|_F$ , we obtain

$$\begin{aligned} \left\|\text{vec}_{\tilde{A}}\left(\boldsymbol{\Sigma}^0\left(\widehat{\boldsymbol{\Delta}}_{\tilde{A}}\boldsymbol{\Sigma}^0\right)^i\right)\right\|_2 &\leq \left\|\sqrt{\boldsymbol{\Sigma}^0}\left(\sqrt{\boldsymbol{\Sigma}^0}\widehat{\boldsymbol{\Delta}}_{\tilde{A}}\sqrt{\boldsymbol{\Sigma}^0}\right)^i\sqrt{\boldsymbol{\Sigma}^0}\right\|_F \\ &\leq \lambda_{\max}(\boldsymbol{\Sigma}^0)\left\|\sqrt{\boldsymbol{\Sigma}^0}\widehat{\boldsymbol{\Delta}}_{\tilde{A}}\sqrt{\boldsymbol{\Sigma}^0}\right\|_F^i = \lambda_{\max}(\boldsymbol{\Sigma}^0)\|\widehat{\boldsymbol{\Delta}}_{\tilde{A}}\|^i \end{aligned} \quad (\text{B.36})$$

Summing over  $i$  yields that

$$\begin{aligned} \left\|\text{vec}_{\tilde{A}}(R_2(\widehat{\boldsymbol{\Delta}}_{\tilde{A}}))\right\|_2 &\leq \sum_{i=2}^{\infty} \left\|\text{vec}_{\tilde{A}}\left(\boldsymbol{\Sigma}^0\left(\widehat{\boldsymbol{\Delta}}_{\tilde{A}}\boldsymbol{\Sigma}^0\right)^i\right)\right\|_2 \\ &\leq \lambda_{\max}(\boldsymbol{\Sigma}^0)\sum_{i=2}^{\infty} \|\widehat{\boldsymbol{\Delta}}_{\tilde{A}}\|^i \leq 2\lambda_{\max}(\boldsymbol{\Sigma}^0)\|\widehat{\boldsymbol{\Delta}}_{\tilde{A}}\|^2. \end{aligned} \quad (\text{B.37})$$

Consequently,

$$\begin{aligned} \text{vec}_B(R_2(\widehat{\boldsymbol{\Delta}}_{\tilde{A}}))\mathbf{I}_{B,B}^{-1}\text{vec}_{\tilde{A}}(R_2(\widehat{\boldsymbol{\Delta}}_{\tilde{A}})) &\leq \|\mathbf{I}_{B,B}^{-1}\|_{\text{opt}} \left\|\text{vec}_{\tilde{A}}(R_2(\widehat{\boldsymbol{\Delta}}_{\tilde{A}}))\right\|_2^2 \\ &\leq \lambda_{\min}^{-2}(\boldsymbol{\Sigma}^0) \left\|\text{vec}_{\tilde{A}}(R_2(\widehat{\boldsymbol{\Delta}}_{\tilde{A}}))\right\|_2^2 \leq 4\kappa_0^2\|\widehat{\boldsymbol{\Delta}}_{\tilde{A}}\|^4. \end{aligned} \quad (\text{B.38})$$

Similarly,  $\text{vec}_{A^0}(R_2(\widehat{\boldsymbol{\Delta}}_{A^0}))\mathbf{I}_{A^0,A^0}^{-1}\text{vec}_{A^0}(R_2(\widehat{\boldsymbol{\Delta}}_{A^0})) \leq 4\kappa_0^2\|\widehat{\boldsymbol{\Delta}}_{A^0}\|^4$ . Hence,

$$\begin{aligned} &\frac{1}{4}\text{vec}_{\tilde{A}}(R_2(\widehat{\boldsymbol{\Delta}}_{\tilde{A}}))\mathbf{I}_{\tilde{A},\tilde{A}}^{-1}\text{vec}_{\tilde{A}}(R_2(\widehat{\boldsymbol{\Delta}}_{\tilde{A}})) - \frac{1}{4}\text{vec}_{A^0}(R_2(\widehat{\boldsymbol{\Delta}}_{A^0}))\mathbf{I}_{A^0,A^0}^{-1}\text{vec}_{A^0}(R_2(\widehat{\boldsymbol{\Delta}}_{A^0})) \\ &\leq \kappa_0^2\|\widehat{\boldsymbol{\Delta}}_{\tilde{A}}\|^4 + \kappa_0^2\|\widehat{\boldsymbol{\Delta}}_{A^0}\|^4 \end{aligned} \quad (\text{B.39})$$

For  $R_1(\widehat{\boldsymbol{\Delta}}_{\tilde{A}}) - R_1(\widehat{\boldsymbol{\Delta}}_{A^0})$ , by Cauchy-Schwartz inequality, we have that  $\text{tr}((\widehat{\boldsymbol{\Delta}}_{\tilde{A}}\boldsymbol{\Sigma}^0)^i) \leq \|\sqrt{\boldsymbol{\Sigma}^0}\widehat{\boldsymbol{\Delta}}_{\tilde{A}}\sqrt{\boldsymbol{\Sigma}^0}\|_F \left\|(\sqrt{\boldsymbol{\Sigma}^0}\widehat{\boldsymbol{\Delta}}_{\tilde{A}}\sqrt{\boldsymbol{\Sigma}^0})^{i-1}\right\|_F \leq \|\widehat{\boldsymbol{\Delta}}_{\tilde{A}}\|^i$ ;  $i = 2, \dots$ . Hence,

$$\left|\sum_{i=4}^{\infty} \frac{(-1)^{i+1}}{i} \text{tr}((\widehat{\boldsymbol{\Delta}}_{\tilde{A}}\boldsymbol{\Sigma}^0)^i)\right| \leq \sum_{i=4}^{\infty} i^{-1}\|\widehat{\boldsymbol{\Delta}}_{\tilde{A}}\|^i \leq \frac{\|\widehat{\boldsymbol{\Delta}}_{\tilde{A}}\|^4}{4(1 - \|\widehat{\boldsymbol{\Delta}}_{\tilde{A}}\|)} \leq \frac{1}{2}\|\widehat{\boldsymbol{\Delta}}_{\tilde{A}}\|^4. \quad (\text{B.40})$$

Similarly,  $\left|\sum_{i=4}^{\infty} \frac{(-1)^{i+1}}{i} \text{tr}((\widehat{\boldsymbol{\Delta}}_{A^0}\boldsymbol{\Sigma}^0)^i)\right| \leq \frac{1}{2}\|\widehat{\boldsymbol{\Delta}}_{A^0}\|^4$ . Combining, we have that

$$\left| R_1(\widehat{\Delta}_{\bar{A}}) - R_1(\widehat{\Delta}_{A^0}) \right| \leq \frac{\left| \text{tr} \left( (\widehat{\Delta}_{\bar{A}} \Sigma^0)^3 \right) - \text{tr} \left( (\widehat{\Delta}_{A^0} \Sigma^0)^3 \right) \right|}{3} + \frac{\|\widehat{\Delta}_{\bar{A}}\|^4 + \|\widehat{\Delta}_{A^0}\|^4}{2} \quad (\text{B.41})$$

Let  $f_{\bar{A}}(\text{vec}_{\bar{A}}(\Delta)) = \text{tr} \left( (\Delta \Sigma^0)^3 \right)$  with  $\text{vec}_{A^c}(\Delta) = \mathbf{0}$ . A Taylor expansion of  $f_{\bar{A}}(\text{vec}_{\bar{A}}(\Delta))$

at  $\text{vec}_{A^0}(\Delta)$  yields that

$$\begin{aligned} & \frac{1}{3} \left| \text{tr} \left( (\widehat{\Delta}_{\bar{A}} \Sigma^0)^3 \right) - \text{tr} \left( (\widehat{\Delta}_{A^0} \Sigma^0)^3 \right) \right| = \frac{1}{3} \left( \text{vec}_{\bar{A}}(\widehat{\Delta}_{\bar{A}}) - \text{vec}_{\bar{A}}(\widehat{\Delta}_{A^0}) \right)^\top \nabla f(\text{vec}_{\bar{A}}(\widehat{\Delta}^*)) \\ & = \left( \text{vec}_{\bar{A}}(\widehat{\Delta}_{\bar{A}} - \widehat{\Delta}_{A^0}) \right)^\top \text{vec}_{\bar{A}} \left( \Sigma^0 (\widehat{\Delta}^* \Sigma^0)^2 \right) = \text{tr} \left( \Sigma^0 (\widehat{\Delta}_{\bar{A}} - \widehat{\Delta}_{A^0}) (\Sigma^0 \widehat{\Delta}^*)^2 \right) \\ & \leq 2 \left\| \sqrt{\Sigma^0} (\widehat{\Delta}_{\bar{A}} - \widehat{\Delta}_{A^0}) \sqrt{\Sigma^0} \right\|_F \max \left( \left\| \sqrt{\Sigma^0} \widehat{\Delta}_{A^0} \sqrt{\Sigma^0} \right\|_F^2, \left\| \sqrt{\Sigma^0} \widehat{\Delta}_{\bar{A}} \sqrt{\Sigma^0} \right\|_F^2 \right) \end{aligned} \quad (\text{B.42})$$

where  $\widehat{\Delta}^*$  is some convex combination of  $\widehat{\Delta}_{\bar{A}}$  and  $\widehat{\Delta}_{A^0}$  and the last equality uses (B.36).

Lastly, we bound  $\left\| \sqrt{\Sigma^0} (\widehat{\Delta}_{\bar{A}} - \widehat{\Delta}_{A^0}) \sqrt{\Sigma^0} \right\|_F = \left\| \mathbf{I}_{\bar{A}, \bar{A}}^{1/2} \text{vec}_{\bar{A}}(\widehat{\Delta}_{\bar{A}} - \widehat{\Delta}_{A^0}) \right\|_2$ . By (B.29), we

have that

$$\begin{aligned} & \mathbf{I}_{\bar{A}, \bar{A}}^{1/2} \text{vec}_{\bar{A}}(\widehat{\Delta}_{\bar{A}} - \widehat{\Delta}_{A^0}) = \mathbf{I}_{\bar{A}, \bar{A}}^{1/2} \left( \text{vec}_{\bar{A}}(\widehat{\Omega}_{\bar{A}} - \Omega^0) - \text{vec}_{\bar{A}}(\widehat{\Omega}_{A^0} - \Omega^0) \right) \\ & = \frac{1}{2} \mathbf{I}_{\bar{A}, \bar{A}}^{-1/2} \text{vec}_{\bar{A}}(\Lambda + R_2(\widehat{\Delta}_{\bar{A}})) - \frac{1}{2} \mathbf{I}_{\bar{A}, \bar{A}}^{1/2} \begin{bmatrix} \mathbf{I}_{A^0, A^0}^{-1} \text{vec}_{A^0}(\Lambda + R_2(\widehat{\Delta}_{A^0})) \\ \mathbf{0} \end{bmatrix} \\ & = \frac{1}{2} \mathbf{I}_{\bar{A}, \bar{A}}^{-1/2} \left( \text{vec}_{\bar{A}}(\Lambda + R_2(\widehat{\Delta}_{\bar{A}})) - \begin{bmatrix} \text{vec}_{A^0}(\Lambda + R_2(\widehat{\Delta}_{A^0})) \\ \mathbf{I}_{B, A^0} \mathbf{I}_{A^0, A^0}^{-1} \text{vec}_{A^0}(\Lambda + R_2(\widehat{\Delta}_{A^0})) \end{bmatrix} \right) \\ & = \frac{1}{2} \mathbf{I}_{\bar{A}, \bar{A}}^{-1/2} \begin{bmatrix} \text{vec}_{A^0}(R_2(\widehat{\Delta}_{\bar{A}}) - R_2(\widehat{\Delta}_{A^0})) \\ \text{vec}_B(\Lambda + R_2(\widehat{\Delta}_{\bar{A}})) - \mathbf{I}_{B, A^0} \mathbf{I}_{A^0, A^0}^{-1} \text{vec}_{A^0}(\Lambda + R_2(\widehat{\Delta}_{A^0})) \end{bmatrix}, \end{aligned} \quad (\text{B.43})$$

where  $\Lambda = \Sigma^0 - \mathbf{S}$ . Let  $\mathbf{J} = \mathbf{I}_{\bar{A}, \bar{A}}^{-1}$ . An application of an inequality  $\left\| \mathbf{I}_{\bar{A}, \bar{A}}^{-1/2} \mathbf{x} \right\|_2^2 = \mathbf{x}^\top \mathbf{J} \mathbf{x} \leq$

$2\mathbf{x}_{A^0}^\top \mathbf{J}_{A^0, A^0} \mathbf{x}_{A^0} + 2\mathbf{x}_B^\top \mathbf{J}_{B, B} \mathbf{x}_B$  yields that

$$\begin{aligned} & \left\| \mathbf{I}_{\bar{A}, \bar{A}}^{-1/2} \begin{bmatrix} \text{vec}_{A^0}(R_2(\widehat{\Delta}_{\bar{A}}) - R_2(\widehat{\Delta}_{A^0})) \\ \text{vec}_B(\Lambda + R_2(\widehat{\Delta}_{\bar{A}})) - \mathbf{I}_{B, A^0} \mathbf{I}_{A^0, A^0}^{-1} \text{vec}_{A^0}(\Lambda + R_2(\widehat{\Delta}_{A^0})) \end{bmatrix} \right\|_F^2 \\ & \leq 2 \left\| \mathbf{J}_{B, B}^{1/2} \left( \text{vec}_{B \setminus A^0}(\Lambda + R_2(\widehat{\Delta}_{\bar{A}})) - \mathbf{I}_{B, A^0} \mathbf{I}_{A^0, A^0}^{-1} \text{vec}_{A^0}(\Lambda + R_2(\widehat{\Delta}_{A^0})) \right) \right\|_2^2 \\ & \quad + 2 \left\| \mathbf{J}_{A^0, A^0}^{1/2} \text{vec}_{A^0}(R_2(\widehat{\Delta}_{\bar{A}}) - R_2(\widehat{\Delta}_{A^0})) \right\|_2^2. \end{aligned} \quad (\text{B.44})$$

Moreover,  $\mathbf{J}_{B, B}^{-1} \mathbf{J}_{B, A^0} + \mathbf{I}_{B, A^0} \mathbf{I}_{A^0, A^0}^{-1} = \mathbf{0}$ . Using this, we have that

$$\begin{aligned}
& \left\| \mathbf{J}_{B,B}^{1/2} \left( \text{vec}_B(\mathbf{\Lambda}) - \mathbf{I}_{B,A^0} \mathbf{I}_{A^0,A^0}^{-1} \text{vec}_{A^0}(\mathbf{\Lambda}) \right) \right\|_2^2 \\
&= \left\| \mathbf{J}_{B,B}^{-1/2} \left( \mathbf{J}_{B,B} \text{vec}_B(\mathbf{\Lambda}) + \mathbf{J}_{B,A^0} \text{vec}_{A^0}(\mathbf{\Lambda}) \right) \right\|_2^2 = \left\| \mathbf{J}_{B,B}^{-1/2} \mathbf{J}_{B,\tilde{A}} \text{vec}_{\tilde{A}}(\mathbf{\Lambda}) \right\|_2^2. \quad (\text{B.45})
\end{aligned}$$

This, together with (B.43) and (B.44), implies that

$$\begin{aligned}
& \left\| \sqrt{\mathbf{\Sigma}^0} (\widehat{\mathbf{\Delta}}_{\tilde{A}} - \widehat{\mathbf{\Delta}}_{A^0}) \sqrt{\mathbf{\Sigma}^0} \right\|_F^2 \\
&\leq \frac{1}{2} \left\| \mathbf{J}_{A^0,A^0}^{1/2} \text{vec}_{A^0}(R_2(\widehat{\mathbf{\Delta}}_{\tilde{A}}) - R_2(\widehat{\mathbf{\Delta}}_{A^0})) \right\|_2^2 + \frac{1}{2} \left\| \mathbf{J}_{B,B}^{-1/2} \mathbf{J}_{B,B} \text{vec}_B(\mathbf{\Lambda}) \right\|_2^2. \quad (\text{B.46})
\end{aligned}$$

By (B.3), the covariance matrix of  $\mathbf{J}_{B,B}^{-1/2} \mathbf{J}_{B,B} \text{vec}_{\tilde{A}}(\mathbf{\Lambda})$  is

$$\begin{aligned}
& \text{Var} \left( \mathbf{J}_{B,B}^{-1/2} \mathbf{J}_{B,B} \text{vec}_B(\mathbf{\Lambda}) \right) = n^{-1} \mathbf{J}_{B,B}^{-1/2} \mathbf{J}_{B,B} \text{Var} \left( \sqrt{n} \text{vec}_{\tilde{A}}(\mathbf{\Lambda}) \right) \mathbf{J}_{\tilde{A},B} \mathbf{J}_{B,B}^{-1/2} \\
&= n^{-1} \mathbf{J}_{B,B}^{-1/2} \mathbf{J}_{B,\tilde{A}} (4\mathbf{J}^{-1}) \mathbf{J}_{\tilde{A},B} \mathbf{J}_{B,B}^{-1/2} = 4n^{-1} \mathbf{J}_{B,B}^{-1/2} \mathbf{J}_{B,B} \mathbf{J}_{B,B}^{-1/2} = 4n^{-1} \mathbf{I}_{|B| \times |B|}, \quad (\text{B.47})
\end{aligned}$$

By Lemma 3,  $\left\| \mathbf{J}_{B,B}^{-1/2} \mathbf{J}_{B,A} \text{vec}_{\tilde{A}}(\mathbf{\Lambda}) \right\|_2^2 \leq |B| \left\| \mathbf{J}_{B,B}^{-1/2} \mathbf{J}_{B,\tilde{A}} \text{vec}_A(\mathbf{\Lambda}) \right\|_\infty^2 = O_p \left( \frac{|B| \log |B|}{n} \right)$ . Using

this and (B.37), we bound (B.46) as follows:

$$\begin{aligned}
& \left\| \sqrt{\mathbf{\Sigma}^0} (\widehat{\mathbf{\Delta}}_{\tilde{A}} - \widehat{\mathbf{\Delta}}_{A^0}) \sqrt{\mathbf{\Sigma}^0} \right\|_F^2 \leq 2^{-1} \lambda_{\min}^{-2}(\mathbf{\Sigma}^0) \left\| R_2(\widehat{\mathbf{\Delta}}_{\tilde{A}}) - R_2(\widehat{\mathbf{\Delta}}_{A^0}) \right\|_F^2 + O_p \left( \frac{|B| \log |B|}{n} \right) \\
&\leq 2\lambda_{\min}^{-2}(\mathbf{\Sigma}^0) \max \left( \left\| R_2(\widehat{\mathbf{\Delta}}_{\tilde{A}}) \right\|_F^2, \left\| R_2(\widehat{\mathbf{\Delta}}_{A^0}) \right\|_F^2 \right) + O_p \left( \frac{|B| \log |B|}{n} \right) \\
&\leq 8\kappa_0^2 \max \left( \left\| \widehat{\mathbf{\Delta}}_{\tilde{A}} \right\|^4, \left\| \widehat{\mathbf{\Delta}}_{A^0} \right\|^4 \right) + O_p \left( \frac{|B| \log |B|}{n} \right).
\end{aligned}$$

Let  $\Delta = \max \left( \left\| \widehat{\mathbf{\Delta}}_{\tilde{A}} \right\|, \left\| \widehat{\mathbf{\Delta}}_{A^0} \right\| \right)$ . Then combining the above bound with (B.42), we obtain

$$\begin{aligned}
& \frac{1}{3} \left| \text{tr} \left( (\widehat{\mathbf{\Delta}}_{\tilde{A}} \mathbf{\Sigma}^0)^3 \right) - \text{tr} \left( (\widehat{\mathbf{\Delta}}_{A^0} \mathbf{\Sigma}^0)^3 \right) \right| \\
&\leq 2 \left\| \sqrt{\mathbf{\Sigma}^0} (\widehat{\mathbf{\Delta}}_{\tilde{A}} - \widehat{\mathbf{\Delta}}_{A^0}) \sqrt{\mathbf{\Sigma}^0} \right\|_F \max \left( \left\| \widehat{\mathbf{\Delta}}_{A^0} \right\|^2, \left\| \widehat{\mathbf{\Delta}}_{\tilde{A}} \right\|^2 \right) \\
&\leq 4\Delta^2 \max \left( 3\kappa_0 \Delta^2, O_p \left( \sqrt{\frac{|B| \log |B|}{n}} \right) \right).
\end{aligned}$$

This together with (B.39) and (B.41) implies that the remainder term  $R(\widehat{\mathbf{\Delta}}_{\tilde{A}}, \widehat{\mathbf{\Delta}}_{A^0})$  defined in (B.32) is bounded by  $n\Delta^2 \max \left( \kappa_0^2 \Delta^2, O_p \left( \sqrt{\frac{|B| \log |B|}{n}} \right) \right)$  up to some positive constants.

By Lemma 5, we have that  $\Delta^2 = O_p \left( \frac{|\tilde{A}| \log p}{n} \right)$ . This together with (B.39) and (B.41) yields that

$$R(\widehat{\mathbf{\Delta}}_{\tilde{A}}, \widehat{\mathbf{\Delta}}_{A^0}) = O_p \left( \max \left( \frac{\kappa_0^2 |\tilde{A}|^2 \log^2(p+1)}{n}, |\tilde{A}| \log(p+1) \sqrt{\frac{|B| \log |B|}{n}} \right) \right)$$

Hence, if  $|B|$  is fixed,  $R(\widehat{\mathbf{\Delta}}_{\tilde{A}}, \widehat{\mathbf{\Delta}}_{A^0}) = o_p(1)$ , provided that  $\frac{\kappa_0^2 |\tilde{A}|^2 \log^2 p}{n} \rightarrow 0$ ; and if  $|\tilde{A} \setminus A^0| \rightarrow \infty$ ,

$R(\widehat{\Delta}_{\tilde{A}}, \widehat{\Delta}_{A^0})/\sqrt{|B|} = o_p(1)$ , provided that  $\frac{\kappa_0^2 |\tilde{A}|^2 \log^2 p \log(|B|)}{n} \rightarrow 0$ . This completes the proof.

## C Proofs of Theorem 3 and 4

**Proof of Theorem 3.** Let  $\Lambda_n(B)$  be the likelihood ratio test statistic defined in Theorem 1. A measure change from  $\mathbb{P}_{\theta^n}$  to  $\mathbb{P}_{\theta^0}$  yields that for any  $u \geq 0$ ,

$$\begin{aligned} & \mathbb{P}_{\theta^n}(\Lambda_n(B) \geq u) = \mathbb{E}_{\theta^n} \mathbb{I}(\Lambda_n(B) \geq u) \\ &= \mathbb{E}_{\theta^0} \left( \mathbb{I}(\Lambda_n(B) > u) \exp(\sqrt{n} \text{vec}_B(\delta_n)^\top Z_n - \frac{n \text{vec}_B(\delta_n)^\top \mathbf{I}_{B,B} \text{vec}_B(\delta_n)}{2} + R_n(\theta^0, \delta_n)) \right), \end{aligned}$$

where  $\mathbb{P}_{\theta^n}$  is the probability measure under  $H_a$ ,  $Z_n = n^{-1/2} \frac{\partial L_n(\theta^0)}{\partial \theta_B}$ ,  $\mathbf{I}$  is the Fisher information matrix, and  $R_n(\theta^0, \delta_n) = L_n(\theta^n) - L_n(\theta^0) - \sqrt{n} \text{vec}_B(\delta_n)^\top Z_n + \frac{n \text{vec}_B(\delta_n)^\top \mathbf{I}_{B,B} \text{vec}_B(\delta_n)}{2}$ . We will verify later that

$$R_n(\theta^0, \delta_n) \xrightarrow{\mathbb{P}_{\theta^0}} 0 \tag{C.1}$$

in the Gaussian graphical model and linear regression model.

For the Gaussian graphical model, we first verify (C.1). Now let  $\mathbf{h}_n = \sqrt{n} \text{vec}_B(\delta_n)$  with  $\|\mathbf{h}_n\|_2 = h$ . Then  $Z_n = n^{-1/2} \frac{\partial L_n(\Omega)}{\partial \Omega_B} = \sqrt{n} \text{vec}_B((\Omega^0)^{-1} - \mathbf{S}) = \sqrt{n} \text{vec}_B(\mathbf{\Lambda})$ . It follows from the Taylor expansion of  $\log \det(\cdot)$  that

$$\begin{aligned} & L_n(\theta^n) - L_n(\theta^0) = n (\log \det(\Omega^n) - \text{tr}(\Omega^n \mathbf{S}) - \log \det(\Omega^0) + \text{tr}(\Omega^0 \mathbf{S})) \\ &= \mathbf{h}_n^\top \sqrt{n} \text{vec}_B((\Omega^0)^{-1} - \mathbf{S}) - \sqrt{n} \mathbf{h}_n^\top \text{vec}_B((\Omega^0)^{-1}) + n (\log \det(\Omega^n) - \log \det(\Omega^0)) \\ &= \mathbf{h}_n^\top Z_n - \frac{1}{2} \mathbf{h}_n^\top \mathbf{I}_{B,B} \mathbf{h}_n + r(\Omega^n), \end{aligned}$$

where we have used (B.26) and

$$r(\boldsymbol{\Omega}^n) = n \sum_{i=3}^{\infty} (-1)^{i+1} \frac{\text{tr} \left[ (\sqrt{\Sigma^0}(\boldsymbol{\Omega}^n - \boldsymbol{\Omega}^0)\sqrt{\Sigma^0})^i \right]}{i} \quad (\text{C.2})$$

By similar calculations as in (B.40), we have that

$$|r(\boldsymbol{\Omega}^n)| \leq \begin{cases} \frac{n}{3} \sum_{i=3}^n (\mathbf{h}_n^\top \mathbf{I}_{B,B} \mathbf{h}_n)^{i/2} \left( \frac{|B|^{1/4}}{\sqrt{n}} \right)^i & \text{if } |B| \rightarrow \infty \\ \frac{n}{3} \sum_{i=3}^n (\mathbf{h}_n^\top \mathbf{I}_{B,B} \mathbf{h}_n)^{i/2} \left( \frac{1}{\sqrt{n}} \right)^i & \text{if } |B| \text{ is fixed.} \end{cases} \quad (\text{C.3})$$

Hence, when  $|B|$  is fixed and  $n$  is large enough, we have that  $|r(\boldsymbol{\Omega}^n)| \leq (\mathbf{h}_n^\top \mathbf{I}_{B,B} \mathbf{h}_n)^{3/2} n^{-1/2} \rightarrow 0$ . When  $|B| \rightarrow \infty$  but  $|B|^{3/2}/n \rightarrow 0$ , we have that  $|r(\boldsymbol{\Omega}^n)| \leq (\mathbf{h}_n^\top \mathbf{I}_{B,B} \mathbf{h}_n)^{3/2} \frac{|B|^{3/4}}{n^{1/2}} \rightarrow 0$ . Therefore,

$$R_n(\boldsymbol{\theta}^0, \delta_n) = L_n(\boldsymbol{\theta}^n) - L_n(\boldsymbol{\theta}^0) - \mathbf{h}_n^\top Z_n + \frac{1}{2} \mathbf{h}_n^\top \mathbf{I}_{B,B} \mathbf{h}_n = r(\boldsymbol{\Omega}^n) \rightarrow 0. \quad (\text{C.4})$$

By (B.35), we have that, with probability tending to 1 under  $P_{\boldsymbol{\theta}^0}$ ,

$$\Lambda_n(B) = \left\| \frac{1}{2} \mathbf{J}_{B,B}^{-1/2} \mathbf{J}_{B,\bar{A}} \sqrt{n} \text{vec}_{\bar{A}}(\boldsymbol{\Lambda}) \right\|_2^2 + R(\widehat{\boldsymbol{\Delta}}_{\bar{A}}, \widehat{\boldsymbol{\Delta}}_{A^0}). \quad (\text{C.5})$$

Note that  $\text{Var}(\text{vec}_{\bar{A}}(\boldsymbol{\Lambda})) = 4\mathbf{I}$ . Hence, by Lemmas 7 and 8,

$$\left( \frac{1}{2} \mathbf{J}_{B,B}^{-1/2} \mathbf{J}_{B,\bar{A}} \sqrt{n} \text{vec}_{\bar{A}}(\boldsymbol{\Lambda}), \frac{1}{2} \sqrt{n} \text{vec}_B(\boldsymbol{\Lambda}) \right) \xrightarrow{d} (Z_1, Z_2) \sim N \left( \mathbf{0}, \begin{pmatrix} \mathbf{I}_{|B| \times |B|} & \mathbf{J}_{B,B}^{-1/2} \\ \mathbf{J}_{B,B}^{-1/2} & \mathbf{I}_{B,B} \end{pmatrix} \right), \quad (\text{C.6})$$

where  $\mathbf{J} = \mathbf{I}^{-1}$ . Therefore,

$$Z_1 \sim N(0, \mathbf{I}_{|B| \times |B|}) \text{ and } Z_2 \mid Z_1 = z_1 \sim N \left( \mathbf{J}_{B,B}^{-1/2} z_1, \mathbf{I}_{B,A^0} \mathbf{I}_{A^0,A^0}^{-1} \mathbf{I}_{A^0,B} \right) \quad (\text{C.7})$$



where the fact that  $\mathbf{J}_{B,B} = (\mathbf{I}_{B,B} - \mathbf{I}_{B,A^0} \mathbf{I}_{A^0,A^0}^{-1} \mathbf{I}_{A^0,B})^{-1}$  is used. Hence, for any  $\theta_j$ ;  $j \in B^c$ ,

$$\begin{aligned}
P_{H_a}(\Lambda_n(B) \geq u) &\rightarrow \mathbb{E} \left( \mathbb{I}(\|Z_1\|_2^2 \geq u) \exp(\mathbf{h}_n^\top Z_2 - \frac{1}{2} \mathbf{h}_n^\top \mathbf{I}_{B,B} \mathbf{h}_n) \right) \\
&= \exp \left( -\frac{1}{2} \mathbf{h}_n^\top \mathbf{I}_{B,B} \mathbf{h}_n \right) \mathbb{E}_{Z_1} \left[ \mathbb{I}(\|Z_1\|_2^2 \geq u) \mathbb{E}_{Z_2|Z_1} (\exp(\mathbf{h}_n^\top Z_2)) \right] \\
&= \exp \left( -\frac{1}{2} \mathbf{h}_n^\top \mathbf{J}_{B,B}^{-1} \mathbf{h}_n \right) \mathbb{E}_{Z_1} \left[ \mathbb{I}(\|Z_1\|_2^2 \geq u) \exp \left( Z_1^\top \mathbf{J}_{B,B}^{-1/2} \mathbf{h}_n \right) \right] \\
&= \mathbb{E}_{Z_1} \mathbb{I}(\|Z_1 + \mathbf{J}_{B,B}^{-1/2} \mathbf{h}_n\|_2^2 \geq u) = \mathbb{P} \left( \|Z_1 + \mathbf{J}_{B,B}^{-1/2} \mathbf{h}_n\|_2^2 \geq u \right)
\end{aligned}$$

where we have used the fact that  $\mathbf{J}_{B,B}^{-1} = \mathbf{I}_{B,B} - \mathbf{I}_{B,A^0} \mathbf{I}_{A^0,A^0}^{-1} \mathbf{I}_{A^0,B}$ . Hence, we must have  $\Lambda_n(B) \xrightarrow{d} \|Z_1 + \mathbf{J}_{B,B}^{-1/2} \mathbf{h}_n\|_2^2$  with  $Z_1 \sim N(\mathbf{0}, \mathbf{I}_{|B| \times |B|})$  when  $|B|$  is fixed. When  $|B| \rightarrow \infty$ , for any vector  $v$  with  $\|v\|_2 = c|B|^{1/4}$  for some constant  $c$ , we have that

$$\frac{\|Z + v\|_2^2 - |B|}{\sqrt{2|B|}} = \frac{\|Z\|_2^2 - |B|}{\sqrt{2|B|}} + \frac{\|v\|_2}{\sqrt{2}|B|^{1/4}} \left( \frac{2v^\top Z}{\|v\|_2 |B|^{1/4}} + \frac{\|v\|_2}{|B|^{1/4}} \right) \xrightarrow{d} N \left( \frac{c^2}{\sqrt{2}}, 1 \right), \quad (\text{C.8})$$

because the first term converges to  $N(0, 1)$  by CLT, and the second term converges  $c^2/\sqrt{2}$  to since  $\frac{2v^\top Z}{\|v\|_2 |B|^{1/4}} \rightarrow 0$  in probability.

Consequently, the *local limiting power functions* for the proposed CMLR test is

$$\pi_{LR}(h, \theta_{B^c}) = \begin{cases} \mathbb{P} \left( \|\mathbf{Z} + \mathbf{J}_{B,B}^{-1/2} \mathbf{h}_n\|_2^2 \geq \chi_{\alpha, |B|}^2 \right) & \text{when } |B| \text{ is fixed,} \\ \mathbb{P} \left( Z + \frac{\mathbf{h}_n^\top \mathbf{J}_{B,B}^{-1} \mathbf{h}_n}{\sqrt{2|B|}} \geq z_\alpha \right) & \text{when } |B| \rightarrow \infty, \end{cases}$$

where  $\alpha > 0$  is the level of significance,  $\mathbf{Z} \sim N(\mathbf{0}, \mathbf{I}_{|B| \times |B|})$  is a multivariate normal random variable, and  $\mathbf{J}_{B,B}$  is the asymptotic variance of  $\text{vec}_B(\widehat{\mathbf{\Omega}}^{(1)})$ .

To make a comparison between the debiased lasso test proposed in [3], we consider the case when  $|B| = 1$ . Assume that  $B = \{(i, j)\}$ . In this case, the *local limiting power functions*

for the proposed method is

$$\pi_{LR}(h, \theta_{B^c}) = \mathbb{P} \left( \left( Z + \frac{|h|}{\sigma_{LR}} \right)^2 > \chi_\alpha^2 \right) = \mathbb{P} \left( \left| Z + \frac{|h|}{\sigma} \right| > z_{\alpha/2} \right) \quad (\text{C.9})$$

where  $\sigma_{LR}^2$  is the asymptotic variance of  $\hat{\omega}_{ij}^{(1)}$ . In contrast, The *local limiting power functions* for the debiased lasso test proposed in [3] is

$$\pi_{debias}(h, \theta_{B^c}) = \mathbb{P} \left( \left| Z + \frac{|h|}{\sqrt{\omega_{ij}^2 + \omega_{ii}\omega_{jj}}} \right| > z_{\alpha/2} \right) \quad (\text{C.10})$$

where  $Z \sim N(0, 1)$  is a standard normal random variable. By applying Corollary 1, we have that  $\sigma_{LR}^2 < \omega_{ij}^2 + \omega_{ii}\omega_{jj}$ , which implies that our  $\pi_{LR}(h, \theta_{B^c}) \geq \pi_{debias}(h, \theta_{B^c})$ . This completes the proof.

**Proof of Theorem 4.** The proof is similar to that of Theorem 3. Again, we first verify that (C.1) is satisfied for linear regression. Toward that end, let  $\mathbf{h}_n = \sqrt{n} \text{vec}_B(\delta_n)$  with  $\|\mathbf{h}_n\|_2 = h$ . Notice that  $L_n(\theta) = L_n(\beta, \sigma) = n \log(1/\sqrt{2\pi}\sigma) - (2\sigma^2)^{-1} \|y - X\beta\|_2^2$ .

$$Z_n = n^{-1/2} \frac{\partial L_n(\beta^0)}{\partial \beta_B^0} = n^{-1/2} \sigma^{-2} \text{vec}_B(X^\top (y - X\beta^0)) = n^{-1/2} \sigma^{-2} \text{vec}_B(X^\top \boldsymbol{\epsilon}), \quad (\text{C.11})$$

where  $\boldsymbol{\epsilon} \sim N(0, \sigma^2 I_{n \times n})$ . Moreover, we have that

$$\begin{aligned} L_n(\boldsymbol{\theta}^n) - L_n(\boldsymbol{\theta}^0) &= (2\sigma^2)^{-1} (\|y - X\beta^0\|_2^2 - \|y - X(\beta^0 + \delta_n)\|_2^2) \\ &= \sqrt{n} \text{vec}_B(\delta_n)^\top n^{-1/2} \sigma^{-2} \text{vec}_B(X^\top (y - X\beta^0)) - (2\sigma^2)^{-1} \text{vec}_B(\delta_n)^\top (X^\top X)_{B,B} \text{vec}_B(\delta_n) \\ &= \mathbf{h}_n^\top Z_n - \frac{1}{2} \mathbf{h}_n^\top \mathbf{I}_{B,B} \mathbf{h}_n \end{aligned}$$

where  $\mathbf{I} = (n\sigma^2)^{-1} X^\top X$ . Hence (C.1) is satisfied with the remaining term to be exactly 0.

By similar arguments used in Theorem 2 and the fact that  $\|\boldsymbol{\epsilon}\|_2^2/n \xrightarrow{\mathbb{P}_{\beta^0}} 0$ , we have that

the likelihood ratio test statistic is

$$\Lambda_n(B) = \boldsymbol{\epsilon}^\top (\mathbf{P}_{A^0 \cup B} - \mathbf{P}_{A^0}) \boldsymbol{\epsilon} + R(\boldsymbol{\epsilon}) \quad (\text{C.12})$$

where  $R(\boldsymbol{\epsilon}) \xrightarrow{\mathbb{P}_{\beta^0}} 0$ . Moreover, since the matrix  $\mathbf{P}_{A^0 \cup B} - \mathbf{P}_{A^0}$  is idempotent and has rank  $|B|$ , there must exist  $\mathbf{a}_1, \dots, \mathbf{a}_{|B|}$  such that  $\mathbf{P}_{A^0 \cup B} - \mathbf{P}_{A^0} = \sum_{k=1}^{|B|} \mathbf{a}_k \mathbf{a}_k^\top$  and

$$\Lambda_n(B) = \sum_{k=1}^{|B|} (\mathbf{a}_k^\top \boldsymbol{\epsilon})^2 + R(\boldsymbol{\epsilon}) \quad (\text{C.13})$$

Note that, under  $\mathbb{P}_{\beta^0}$ , we have that

$$((\mathbf{a}_1^\top \boldsymbol{\epsilon}, \dots, \mathbf{a}_{|B|}^\top \boldsymbol{\epsilon}), \text{vec}_B(\mathbf{X}^\top \boldsymbol{\epsilon})) = (Z_1, Z_2) \sim N \left( \mathbf{0}, \begin{pmatrix} I_{|B| \times |B|} & \mathbf{A} \mathbf{X}_B \\ \mathbf{X}_B^\top \mathbf{A}^\top & \mathbf{X}_B^\top \mathbf{X}_B \end{pmatrix} \right) \quad (\text{C.14})$$

where  $\mathbf{A} = (\mathbf{a}_1, \dots, \mathbf{a}_{|B|})^\top \in \mathbb{R}^{|B| \times n}$ .

Therefore,

$$Z_1 \sim N(0, I_{|B| \times |B|}) \text{ and } Z_2 \mid Z_1 = z_1 \sim N(\mathbf{X}_B^\top \mathbf{A}^\top z_1, \mathbf{X}_B^\top (I_{n \times n} - \mathbf{A}^\top \mathbf{A}) \mathbf{X}_B) \quad (\text{C.15})$$

Hence, for any  $\beta_j; j \in B^c$  and any  $u \geq 0$ ,

$$\begin{aligned}
& P_{H_a}(\Lambda_n(B) \geq u) \\
\rightarrow & \mathbb{E} \left( \mathbb{I}(\|Z_1\|_2^2 \geq u) \exp(\mathbf{h}_n^\top Z_2 - \frac{1}{2} \mathbf{h}_n^\top \mathbf{X}_B^\top \mathbf{X}_B \mathbf{h}_n) \right) \\
= & \exp \left( -\frac{1}{2} \mathbf{h}_n^\top \mathbf{X}_B^\top \mathbf{X}_B \mathbf{h}_n \right) \mathbb{E}_{Z_1} \left[ \mathbb{I}(\|Z_1\|_2^2 \geq u) \mathbb{E}_{Z_2|Z_1} (\exp(\mathbf{h}_n^\top Z_2)) \right] \\
= & \exp \left( -\frac{1}{2} \mathbf{h}_n^\top \mathbf{X}_B^\top \mathbf{X}_B \mathbf{h}_n \right) \mathbb{E}_{Z_1} \left[ \mathbb{I}(\|Z_1\|_2^2 \geq u) \exp \left( Z_1^\top \mathbf{A} \mathbf{X}_B \mathbf{h}_n + \frac{1}{2} \mathbf{h}_n^\top \mathbf{X}_B^\top (I_{n \times n} - \mathbf{A}^\top \mathbf{A}) \mathbf{X}_B \mathbf{h}_n \right) \right] \\
= & \exp \left( -\frac{1}{2} \mathbf{h}_n^\top \mathbf{X}_B^\top \mathbf{A}^\top \mathbf{A} \mathbf{X}_B \mathbf{h}_n \right) \mathbb{E}_{Z_1} \left[ \mathbb{I}(\|Z_1\|_2^2 \geq u) \exp (Z_1^\top \mathbf{A} \mathbf{X}_B \mathbf{h}_n) \right] \\
= & \mathbb{E}_{Z_1} \mathbb{I}(\|Z_1 + \mathbf{A} \mathbf{X}_B \mathbf{h}_n\|_2^2 \geq u) = \mathbb{P} (\|Z_1 + \mathbf{A} \mathbf{X}_B \mathbf{h}_n\|_2^2 \geq u)
\end{aligned}$$

Hence, we must have  $\Lambda_n(B) \xrightarrow{d} \|Z + \mathbf{A} \mathbf{X}_B \mathbf{h}_n\|_2^2$  with  $Z \sim N(\mathbf{0}, I_{|B| \times |B|})$  when  $|B|$  is fixed.

When  $|B| \rightarrow \infty$ , a similar argument used in Theorem 3 can be applied.

Consequently, the *local limiting power functions* for the proposed CMLR test is

$$\pi_{LR}(h, \beta_{B^c}) = \begin{cases} \mathbb{P} \left( \|Z + \mathbf{A} \mathbf{X}_B \mathbf{h}_n\|_2^2 \geq \chi_{\alpha, |B|}^2 \right) & \text{if } |B| \text{ is fixed,} \\ \mathbb{P} \left( Z_1 + \frac{\|\mathbf{A} \mathbf{X}_B \mathbf{h}_n\|_2^2}{\sqrt{2|B|}} \geq z_\alpha \right) & \text{if } |B| \rightarrow \infty \quad . \end{cases} \quad (\text{C.16})$$

where  $\alpha > 0$  is the level of significance,  $Z \sim N(\mathbf{0}, I_{|B| \times |B|})$  is a multivariate normal random variable, and  $Z_1 \sim N(0, 1)$  is a standard normal random variable.

Since  $\mathbf{A} \mathbf{X}_B$  has full rank  $|B|$ , it is easy to see that when  $\|\mathbf{h}_n\|_2 \rightarrow \infty$  and  $|B|$  is finite, then  $\pi_{LR}(h, \beta_{B^c}) \rightarrow 1$ ; and when  $\|\mathbf{h}_n\|_2^2 / \sqrt{|B|} \rightarrow \infty$  and  $|B| \rightarrow \infty$ , then  $\pi_{LR}(h, \beta_{B^c}) \rightarrow 1$ .

This completes the proof.

## References

- [1] P. Billingsley. *Convergence of probability measures*, volume 493. John Wiley & Sons, 2009.
- [2] L. D. Brown. Fundamentals of statistical exponential families with applications in statistical decision theory. *Lecture Notes-monograph series*, pages 1–279, 1986.
- [3] J. Janková and S. Van de Geer. Honest confidence regions and optimality in high-dimensional precision matrix estimation. *TEST*, pages 1–20, 2016.
